# Supplementary material
Source: Research Square preprint supplement (doi:10.21203/rs.3.rs-9543038/v1)
Supplement: Supplementary file 1 [file 5b044daffc8c611073fe0ffc.pdf]

1 **Title: Phase 2b bivalent GI.1/GII.4c norovirus vaccination in infants and serologic evidence that**  
2 **pre-existing immunity is required for broad GII.4 neutralization**

3 **Supplemental Index**

4 **Contents**

5 **NOR-212: Patient disposition and demographics ..... 3**

6 **Table S1. NOR-212 (NEST-IN1) participant disposition (randomized participants). ..... 3**

7 **Table S2. Characteristics of the enrolled and randomized population in NOR-212 study (FAS) ..... 4**

8 **NOR-212: AGE Cases ..... 5**

9 **Table S3. Overview of all AGE events and evaluable RT-PCR confirmed norovirus AGE events during**  
10 **the 6-month and ~16-month AGE surveillance periods in the NOR-212 study (mFAS) ..... 5**

11 **Figure S1. Evaluation of placebo AGE case accrual against expected epidemiologic incidence rates**  
12 **during the 6-month AGE surveillance period in the NOR-212 study. .... 7**

13 **NOR-212: Efficacy..... 8**

14 **Table S4. Concordance of vaccine efficacy estimates between Cox proportional hazard and Poisson**  
15 **regression models during the 6-month AGE surveillance period in the NOR-212 study (mFAS). ..... 8**

16 **Table S5. Distribution of participants included in GII.4 sNAb breadth analyses among participants**  
17 **with a first GII.4-associated AGE event through the 6-month AGE surveillance period, stratified by**  
18 **variant, severity, and country in the NOR-212 study. .... 9**

19 **Table S6. Vaccine efficacy against second AGE events by norovirus genotype/genogroup and**  
20 **symptom severity, excluding other GE pathogens during the 6-month and ~16-month AGE**  
21 **surveillance periods in the NOR-212 study (mFAS)..... 11**

22 **NOR-212: Safety ..... 13**

23 **Table S7. Incidence of adverse events after any dose during the 6-month and ~16-month AGE**  
24 **surveillance periods in the NOR-212 study (SAF)..... 13**

25 **NOR-212: Immunogenicity ..... 14**

26 **Table S8. GI.1 and GII.4c-specific sNAbT (HBGA-blocking) and pan-Ig GMCs and GMFRs in**  
27 **participants who received HIL-214 or placebo in the NOR-212 study (FAS). ..... 14**

28 **Table S9. Seroresponse rates (SRRs) of GI.1 and GII.4c-specific HBGA-blocking antibodies (sNAb) in**  
29 **participants who received HIL-214 or placebo in the NOR-212 study (FAS). ..... 15**

30 **NOR-212: Breadth of GII.4 immune responses following vaccination and GII.4 associated AGE..... 16**

31 **Table S10. Summary of participants included and excluded from GII.4 sNAb breadth analyses,**  
32 **stratified by variant and severity, among those with a first GII.4-associated AGE event during the 6-**  
33 **month AGE surveillance period in the NOR-212 study. .... 16**

34 **Table S11. Summary of demographic characteristics of participants evaluated for GII.4 sNAb breadth**  
35 **during the 6-month AGE surveillance period in the NOR-212 study. .... 17**

36 **Table S12. Association between GII.4 AGE severity (mild vs. mod/sev) and GII.4 variant specific**  
37 **sNAbT at Visit 4 in HIL-214 and placebo recipients (NOR-212)..... 18**

38 **Table S13. GII.4 variant-specific sNAbT at Visit 4 stratified by severity of first GII.4 AGE event and**  
39 **infecting GII.4 variant in HIL-214 and placebo recipients between Visits 3 and 4 (NOR-212). .... 19**

40 **Figure S2. GII.4 sNAbT breadth at Visits 4-6 in participants who experienced a first GII.4-associated**  
41 **AGE event between Visits 3 and Visit 4 in the NOR-212 study..... 20**

42 **Table S14. Proportion of HIL-214 (aged 0.4, 0.5-<1, 1-<4, and 18<50 yrs) and placebo (aged 0.4 yrs)**  
43 **recipients achieving  $\geq$ 4-fold increase in GII.4 sNAbT to between 0 and 5 variants, stratified by study,**  
44 **age group, and pre-vaccination GII.4 status (NOR-212, NOR-202, NOR-215). ..... 21**

45 **Nonclinical: Sequential immunization of GII.4 naïve mice with divergent GII.4 variants improves**  
46 **breadth..... 22**

47 **Figure S3. G II.4 sNAb responses against heterologous variants following single or combined GII.4**  
48 **variant VLP immunization in human norovirus-naïve mice..... 22**

49 **NOR-202: Patient disposition and demographics among HIL-214 vaccinated children (0.4-<9 yrs) tested**  
50 **for GII.4 sNAbT breadth ..... 23**

51 **Table S15. Summary of demographic characteristics of children evaluated for GII.4 sNAb breadth by**  
52 **pre-specified and post-hoc defined age groups among recipients of single dose of a HIL-214 (15/15,**  
53 **15/50, 50/50, 50/150  $\mu$ g) in the NOR-202 study..... 23**

54 **NOR-215: Patient disposition and demographics among HIL-214 vaccinated adults tested for GII.4**  
55 **sNAbT breadth ..... 25**

56 **Table S16. Summary of demographic characteristics of adults evaluated for GII.4 sNAb breadth**  
57 **among recipients of a single dose of a HIL-214 (50/150  $\mu$ g) in the NOR-215 study<sup>5</sup>. ..... 25**

58 **NOR-202/NOR-215: HIL-214 boosts GII.4 sNAbT breadth in older children and adults exposed to**  
59 **contemporary GII.4\_SY variants ..... 26**

60 **Table S17. GII.4 sNAb GMT (95% CI) in infants, toddlers, and children aged 0.5-<9 years in the NOR-**  
61 **202 study and adults aged 18-<50 years in the NOR-215 study. .... 26**

62 **Table S18. GII.4 sNAb GMFR (95% CI) in infants, toddlers, and children aged 0.5-<9 years in the NOR-**  
63 **202 study and adults aged 18-<50 years in the NOR-215 study. .... 27**

64 **Figure S4 GII.4 sNAb responses by pre-vaccination serostatus following HIL-214 vaccination in**  
65 **participants aged 0.5-<50 years in the NOR-202 and NOR-215 studies..... 28**

66 **Figure S5. GII.4 sNAb response breadth and magnitude by ICH E11 age strata and pre-vaccination**  
67 **GII.4 serostatus (NOR-212, NOR-202, NOR-215). ..... 29**

68 **Citations:..... 30**

69

70

72 **Table S1. NOR-212 (NEST-IN1) participant disposition (randomized participants).**

73

| Category                                                                         | Number of Participants, n (%) |                     |                   |
|----------------------------------------------------------------------------------|-------------------------------|---------------------|-------------------|
|                                                                                  | HIL-214<br>(N=1542)           | Placebo<br>(N=1542) | Total<br>(N=3084) |
| <b>Two vaccinations</b>                                                          | 1425 (92.4)                   | 1399 (90.7)         | 2824 (91.6)       |
| <b>One vaccination</b>                                                           | 115 (7.5)                     | 139 (9.0)           | 254 (8.2)         |
| <b>No vaccination</b>                                                            | 2 (0.1)                       | 4 (0.3)             | 6 (0.2)           |
| <b>Discontinuation from vaccine regimen</b>                                      | 117 (7.6)                     | 143 (9.3)           | 260 (8.4)         |
| Primary reason:                                                                  |                               |                     |                   |
| Adverse event                                                                    | 1 (<0.1)                      | 1 (<0.1)            | 2 (<0.1)          |
| Lost to follow-up                                                                | 11 (0.7)                      | 14 (0.9)            | 25 (0.8)          |
| Withdrawal by LAR                                                                | 74 (4.8)                      | 90 (5.8)            | 164 (5.3)         |
| Protocol deviation                                                               | 4 (0.3)                       | 11 (0.7)            | 15 (0.5)          |
| Other                                                                            | 27 (1.8)                      | 27 (1.8)            | 54 (1.8)          |
| <b>Visit 2 completed; Age: ~6 mos</b>                                            | 1462 (94.8)                   | 1434 (93.0)         | 2896 (93.9)       |
| <b>Discontinued from Trial (by Visit 2/Day 43)</b>                               | 80 (5.2)                      | 107 (6.9)           | 187 (6.1)         |
| Primary reason:                                                                  |                               |                     |                   |
| Adverse event                                                                    | 0                             | 1 (<0.1)            | 1 (<0.1)          |
| Lost to follow-up                                                                | 9 (0.6)                       | 14 (0.9)            | 23 (0.7)          |
| Withdrawal by LAR                                                                | 70 (4.5)                      | 84 (5.4)            | 154 (5.0)         |
| Other                                                                            | 0                             | 4 (0.3)             | 4 (0.1)           |
| <b>Visit 3 completed; Age: ~7 mos</b>                                            | 1441 (93.5)                   | 1417 (91.9)         | 2858 (92.7)       |
| <b>Discontinued from Trial (by Visit 3/Day 71)</b>                               | 101 (6.5)                     | 125 (8.1)           | 226 (7.3)         |
| Primary reason:                                                                  |                               |                     |                   |
| Adverse event                                                                    | 0                             | 1 (<0.1)            | 1 (<0.1)          |
| Lost to follow-up                                                                | 14 (0.9)                      | 19 (1.2)            | 33 (1.1)          |
| Withdrawal by LAR                                                                | 86 (5.6)                      | 99 (6.4)            | 185 (6.0)         |
| Other                                                                            | 1 (<0.1)                      | 4 (0.3)             | 5 (0.2)           |
| <b>Visit 4 completed; Age: 1 yr</b>                                              | 1414 (91.7)                   | 1392 (90.3)         | 2806 (91.0)       |
| <b>Discontinued from Trial (by Visit 4/Day 210)</b>                              | 128 (8.3)                     | 150 (9.7)           | 278 (9.0)         |
| Primary reason:                                                                  |                               |                     |                   |
| Adverse event                                                                    | 0                             | 1 (<0.1)            | 1 (<0.1)          |
| Lost to follow-up                                                                | 22 (1.4)                      | 28 (1.8)            | 50 (1.6)          |
| Withdrawal by LAR                                                                | 98 (6.4)                      | 113 (7.3)           | 211 (6.8)         |
| Death                                                                            | 2 (0.1)                       | 0                   | 2 (<0.1)          |
| Other                                                                            | 5 (0.3)                       | 8 (0.5)             | 13 (0.4)          |
| <b>Primary analysis completed; Age: ~13 mos</b>                                  | 1410 (91.4)                   | 1381 (89.6)         | 2791 (90.5)       |
| <b>Discontinued from Trial (by 6 months AGE surveillance)</b>                    | 132 (8.6)                     | 161 (10.4)          | 293 (9.5)         |
| Primary reason:                                                                  |                               |                     |                   |
| Adverse event                                                                    | 0                             | 1 (<0.1)            | 1 (<0.1)          |
| Lost to follow-up                                                                | 22 (1.4)                      | 29 (1.9)            | 51 (1.7)          |
| Withdrawal by LAR                                                                | 103 (6.7)                     | 122 (7.9)           | 225 (7.3)         |
| Death                                                                            | 2 (0.1)                       | 1 (<0.1)            | 3 (0.1)           |
| Other                                                                            | 5 (0.3)                       | 8 (0.5)             | 13 (0.4)          |
| <b>Visit 5 completed; Age: 18 mos</b>                                            | 1399 (90.7)                   | 1364 (88.5)         | 2763 (89.6)       |
| <b>Discontinued from Trial (by Visit 5/Day 390)</b>                              | 143 (9.3)                     | 176 (11.4)          | 319 (10.3)        |
| Primary reason:                                                                  |                               |                     |                   |
| Adverse event                                                                    | 0                             | 1 (<0.1)            | 1 (<0.1)          |
| Lost to follow-up                                                                | 25 (1.6)                      | 34 (2.2)            | 59 (1.9)          |
| Withdrawal by LAR                                                                | 105 (6.8)                     | 130 (8.4)           | 235 (7.6)         |
| Death                                                                            | 2 (0.1)                       | 1 (<0.1)            | 3 (<0.1)          |
| Other                                                                            | 11 (0.7)                      | 10 (0.6)            | 21 (0.7)          |
| <b>Final analysis completed; Age: 2 yrs</b>                                      | 1178 (76.4)                   | 1142 (74.1)         | 2320 (75.3)       |
| <b>Discontinued from Trial (by Visit 6/Day 570; ~16 months AGE surveillance)</b> | 363 (23.5)                    | 398 (25.8)          | 761 (24.7)        |
| Primary reason:                                                                  |                               |                     |                   |
| Adverse event                                                                    | 0                             | 1 (<0.1)            | 1 (<0.1)          |
| Lost to follow-up                                                                | 34 (2.2)                      | 42 (2.7)            | 76 (2.5)          |
| Withdrawal by LAR                                                                | 111 (7.2)                     | 135 (8.8)           | 246 (8.0)         |
| Death                                                                            | 2 (0.1)                       | 1 (<0.1)            | 3 (<0.1)          |
| Other                                                                            | 216 (14.0)                    | 219 (14.2)          | 435 (14.1)        |

74

75 Abbreviation: LAR, legally authorized representative.

76

77 **Table S2. Characteristics of the enrolled and randomized population in NOR-212 study (FAS)**

78

| Category                         | Number of Participants, n (%) |                     |                   |
|----------------------------------|-------------------------------|---------------------|-------------------|
|                                  | HIL-214<br>(N=1540)           | Placebo<br>(N=1538) | Total<br>(N=3078) |
| <b>Age, months</b>               |                               |                     |                   |
| Mean (SD)                        | 5.0 ± 0.3                     | 4.9 ± 0.3           | 5.0 ± 0.3         |
| <b>Gender, n (%)</b>             |                               |                     |                   |
| Female                           | 777 (50.5)                    | 800 (52.0)          | 1577 (51.2)       |
| Male                             | 763 (49.5)                    | 738 (48.0)          | 1501 (48.8)       |
| <b>Ethnicity, n (%)</b>          |                               |                     |                   |
| Hispanic or Latino               | 1521 (98.8)                   | 1520 (98.8)         | 3041 (98.8)       |
| Unknown                          | 14 (0.9)                      | 14 (0.9)            | 28 (0.9)          |
| Not Hispanic or Latino           | 5 (0.3)                       | 4 (0.3)             | 9 (0.3)           |
| <b>Race, n (%)</b>               |                               |                     |                   |
| Other                            | 1429 (92.8)                   | 1429 (92.9)         | 2858 (92.9)       |
| Not Reported                     | 72 (4.7)                      | 61 (4.0)            | 133 (4.3)         |
| Unknown                          | 15 (1.0)                      | 16 (1.0)            | 31 (1.0)          |
| Black or African American        | 10 (0.6)                      | 14 (0.9)            | 24 (0.8)          |
| Multiracial                      | 10 (0.6)                      | 12 (0.8)            | 22 (0.7)          |
| White                            | 3 (0.2)                       | 5 (0.3)             | 8 (0.3)           |
| American Indian or Alaska Native | 0                             | 1 (<0.1)            | 1 (<0.1)          |
| Asian                            | 1 (<0.1)                      | 0                   | 1 (<0.1)          |
| <b>Country, n (%)</b>            |                               |                     |                   |
| Panama                           | 818 (53.1)                    | 817 (53.1)          | 1635 (53.1)       |
| Dominican Republic               | 310 (20.1)                    | 308 (20.0)          | 618 (20.1)        |
| Honduras                         | 260 (16.9)                    | 260 (16.9)          | 520 (16.9)        |
| Peru                             | 105 (6.8)                     | 105 (6.8)           | 210 (6.8)         |
| Colombia                         | 43 (2.8)                      | 44 (2.9)            | 87 (2.8)          |
| Puerto Rico                      | 3 (0.2)                       | 3 (0.2)             | 6 (0.2)           |
| United States of America         | 1 (<0.1)                      | 1 (<0.1)            | 2 (<0.1)          |

79

80 Abbreviations: SD, standard deviation; FAS, Full Analysis Set.

81

83 Table S3. Overview of all AGE events and evaluable RT-PCR confirmed norovirus AGE events during the 6-  
84 month and ~16-month AGE surveillance periods in the NOR-212 study (mFAS)

85

| Category                                                                           | Number of Participants/Events, n (%) |                             |                           |                             |
|------------------------------------------------------------------------------------|--------------------------------------|-----------------------------|---------------------------|-----------------------------|
|                                                                                    | HIL-214<br>(N=1425)                  |                             | Placebo<br>(N=1399)       |                             |
|                                                                                    | 6 mos AGE<br>surveillance            | ~16 mos AGE<br>surveillance | 6 mos AGE<br>surveillance | ~16 mos AGE<br>surveillance |
| <b>Number of participants with AGE events, N<sub>p</sub><sup>a</sup></b>           | <b>491 (34.5)</b>                    | <b>856 (60.1)</b>           | <b>482 (34.5)</b>         | <b>836 (59.8)</b>           |
| <b>Number of AGE events, N<sub>A</sub></b>                                         | <b>851</b>                           | <b>2536</b>                 | <b>829</b>                | <b>2445</b>                 |
| <b>Number of participants with norovirus AGE events, N<sub>N</sub><sup>c</sup></b> | <b>170 (11.9)</b>                    | <b>319 (22.4)</b>           | <b>170 (12.2)</b>         | <b>318 (22.7)</b>           |
| Number of participants with norovirus AGE by number of events <sup>d</sup>         |                                      |                             |                           |                             |
| 1                                                                                  | 145 (85.3)                           | 236 (74.0)                  | 144 (84.7)                | 228 (71.7)                  |
| 2                                                                                  | 23 (13.5)                            | 67 (21.0)                   | 22 (12.9)                 | 62 (19.5)                   |
| 3                                                                                  | 2 (1.2)                              | 16 (5.0)                    | 3 (1.8)                   | 25 (7.9)                    |
| 4                                                                                  | 0                                    | 0                           | 0                         | 1 (0.3)                     |
| ≥5                                                                                 | 0                                    | 0                           | 0                         | 2 (0.6)                     |
| <b>Number of norovirus AGE events, N<sub>NA</sub></b>                              | <b>197</b>                           | <b>418</b>                  | <b>202</b>                | <b>442</b>                  |
| Number of norovirus AGE events by severity grading <sup>e</sup>                    |                                      |                             |                           |                             |
| No score                                                                           | 21 (10.7)                            | 0                           | 24 (11.9)                 | 0                           |
| Mild                                                                               | 92 (46.7)                            | 238 (56.9)                  | 98 (48.5)                 | 240 (54.3)                  |
| Moderate                                                                           | 30 (15.2)                            | 75 (17.9)                   | 30 (14.9)                 | 83 (18.8)                   |
| Severe                                                                             | 54 (27.4)                            | 105 (25.1)                  | 50 (24.8)                 | 119 (26.9)                  |
| Number of norovirus events by genogroup <sup>e</sup>                               |                                      |                             |                           |                             |
| GI                                                                                 | 44 (22.3)                            | 83 (19.9)                   | 31 (15.3)                 | 71 (16.1)                   |
| GII                                                                                | 158 (80.2)                           | 342 (81.8)                  | 173 (85.6)                | 377 (85.3)                  |
| GI & GII                                                                           | 5                                    | 7                           | 2                         | 6                           |
| <b>Number of norovirus AGE events with norovirus genotype, N<sub>T</sub></b>       | <b>161</b>                           | <b>346</b>                  | <b>161</b>                | <b>356</b>                  |
| Number of norovirus AGE events by genotype <sup>f,g</sup>                          |                                      |                             |                           |                             |
| GI.1                                                                               | 0                                    | 0                           | 0                         | 0                           |
| GII.4                                                                              | 69 (42.9)                            | 123 (35.5)                  | 69 (42.9)                 | 121 (34.0)                  |
| GI.2                                                                               | 0                                    | 0                           | 1 (0.6)                   | 2 (0.6)                     |
| GI.3                                                                               | 8 (5.0)                              | 19 (5.5)                    | 4 (2.5)                   | 9 (2.5)                     |
| GI.4                                                                               | 1 (0.6)                              | 1 (0.3)                     | 0                         | 0                           |
| GI.5                                                                               | 21 (13.0)                            | 35 (10.1)                   | 18 (11.2)                 | 41 (11.5)                   |
| GI.6                                                                               | 1 (0.6)                              | 1 (0.3)                     | 0                         | 2 (0.6)                     |
| GI.7                                                                               | 0                                    | 2 (0.6)                     | 0                         | 1 (0.3)                     |
| GII.1                                                                              | 1 (0.6)                              | 7 (2.0)                     | 1 (0.6)                   | 7 (2.0)                     |
| GII.2                                                                              | 1 (0.6)                              | 3 (0.9)                     | 0                         | 0                           |
| GII.3                                                                              | 1 (0.6)                              | 6 (1.7)                     | 2 (1.2)                   | 5 (1.4)                     |
| GII.6                                                                              | 11 (6.8)                             | 30 (8.7)                    | 12 (7.5)                  | 29 (8.1)                    |
| GII.7                                                                              | 3 (1.9)                              | 18 (5.2)                    | 2 (1.2)                   | 15 (4.2)                    |
| GII.8                                                                              | 2 (1.2)                              | 7 (2.0)                     | 4 (2.5)                   | 7 (2.0)                     |
| GII.9                                                                              | 2 (1.2)                              | 3 (0.9)                     | 0                         | 1 (0.3)                     |
| GII.10                                                                             | 0                                    | 1 (0.3)                     | 0                         | 3 (0.8)                     |
| GII.12                                                                             | 0                                    | 2 (0.6)                     | 0                         | 5 (1.4)                     |
| GII.14                                                                             | 0                                    | 10 (2.9)                    | 2 (1.2)                   | 19 (5.3)                    |
| GII.17                                                                             | 37 (23.0)                            | 74 (21.4)                   | 40 (24.8)                 | 80 (22.5)                   |
| GII.21                                                                             | 1 (0.6)                              | 1 (0.3)                     | 3 (1.9)                   | 3 (0.8)                     |
| GII.27                                                                             | 2 (1.2)                              | 3 (0.9)                     | 2 (1.2)                   | 5 (1.4)                     |
| GIX.1                                                                              | 0                                    | 0                           | 1 (0.6)                   | 1 (0.3)                     |
| <b>Number of norovirus AGE events with co-infection, N<sub>c</sub></b>             | <b>107</b>                           | <b>253</b>                  | <b>90</b>                 | <b>266</b>                  |
| Number of norovirus AGE event by other GE pathogen <sup>h</sup>                    |                                      |                             |                           |                             |
| Any                                                                                | 89 (83.2)                            | 202 (79.8)                  | 75 (83.3)                 | 208 (78.2)                  |
| Multiple                                                                           | 16 (15.0)                            | 45 (17.8)                   | 13 (14.4)                 | 47 (17.7)                   |
| <i>Campylobacter</i>                                                               | 26 (24.3)                            | 53 (20.9)                   | 30 (33.3)                 | 59 (22.2)                   |

|                        |           |           |           |            |
|------------------------|-----------|-----------|-----------|------------|
| <i>E.Coli (ETEC)</i>   | 28 (26.2) | 47 (18.6) | 23 (25.6) | 49 (18.4)  |
| <i>Salmonella</i>      | 26 (24.3) | 90 (35.6) | 20 (22.2) | 112 (42.1) |
| <i>Shigella</i>        | 15 (14.0) | 37 (14.6) | 9 (10.0)  | 28 (10.5)  |
| <i>Cryptosporidium</i> | 4 (3.7)   | 11 (4.3)  | 5 (5.6)   | 10 (3.8)   |
| Rotavirus              | 7 (6.5)   | 11 (4.3)  | 0         | 4 (1.5)    |
| Adenovirus DNA         | 1 (0.9)   | 4 (1.6)   | 3 (3.3)   | 4 (1.5)    |

---

86

87

a. Percentage (%) =  $N_p/N$ .

88

b. Percentage (%) =  $N_N/N$ .

89

c. Percentage (%) =  $n/N_N$ .

90

d. AGE severity grading based on non-imputed modified Vesikari score<sup>1</sup>.

91

e. Percentage (%) =  $n/N_{NA}$ .

92

f. Percentage (%) =  $n/N_T$ .

93

g. Norovirus genotyping performed by CDC was used for analyses.

94

h. Percentage (%) =  $n/N_c$

95

Abbreviations: AGE, acute gastroenteritis; GE, gastroenteritis; mFAS, modified Full Analysis Set.

96

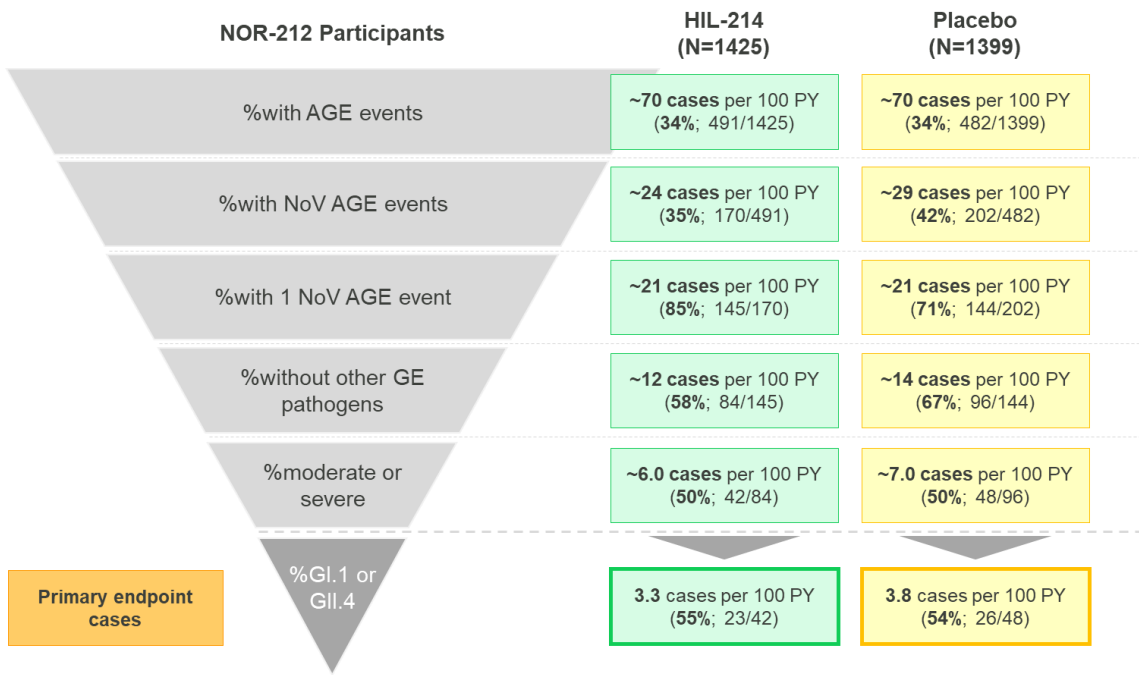

99 **Figure S1. Evaluation of placebo AGE case accrual against expected epidemiologic incidence rates during**  
 100 **the 6-month AGE surveillance period in the NOR-212 study.**

**NOR-212: Efficacy**

**Table S4. Concordance of vaccine efficacy estimates between Cox proportional hazard and Poisson regression models during the 6-month AGE surveillance period in the NOR-212 study (mFAS).**

| Norovirus genotypes or genogroups | AGE symptom severity | Number of Participants with Events, n (%) <sup>a</sup> |                        | Vaccine efficacy, % (95% CI) <sup>b</sup> | Vaccine efficacy, % (95% CI) <sup>c</sup> |
|-----------------------------------|----------------------|--------------------------------------------------------|------------------------|-------------------------------------------|-------------------------------------------|
|                                   |                      | HIL-214 (N=1425)                                       | Placebo (N=1399)       | 6 mos AGE surveillance                    | 6 mos AGE surveillance                    |
|                                   |                      | 6 mos AGE surveillance                                 | 6 mos AGE surveillance | 6 mos AGE surveillance                    | 6 mos AGE surveillance                    |
| <b>First GI.1 or GII.4</b>        | <b>Mod/Sev</b>       | <b>23 (1.6)</b>                                        | <b>26 (1.9)</b>        | <b>14 (-53 to 50)</b>                     | <b>13 (-52 to 51)</b>                     |
| <b>First GI.1 or GII.4</b>        | <b>Mild</b>          | <b>16 (1.1)</b>                                        | <b>18 (1.3)</b>        | <b>12 (-72 to 55)</b>                     | <b>12 (-72 to 55)</b>                     |
| <b>First GI.1 or GII.4</b>        | <b>Mild/Mod/Sev</b>  | <b>39 (2.7)</b>                                        | <b>43 (3.1)</b>        | <b>11 (-38 to 42)</b>                     | <b>11 (-37 to 42)</b>                     |
| <b>First GI or GII</b>            | <b>Mod/Sev</b>       | <b>43 (3.0)</b>                                        | <b>51 (3.6)</b>        | <b>17 (-25 to 45)</b>                     | <b>17 (-24 to 45)</b>                     |
| <b>First GI or GII</b>            | <b>Mild</b>          | <b>46 (3.2)</b>                                        | <b>55 (3.9)</b>        | <b>18 (-22 to 44)</b>                     | <b>18 (-22 to 44)</b>                     |
| <b>First GI or GII</b>            | <b>Mild/Mod/Sev</b>  | <b>88 (6.2)</b>                                        | <b>103 (7.4)</b>       | <b>16 (-11 to 37)</b>                     | <b>16 (-11 to 37)</b>                     |

a. Percentage (%) = n/N.

b. Primary, secondary, and exploratory efficacy endpoint analyses (grey shaded column): Vaccine efficacy is defined  $100\%[1 - (\lambda_V/\lambda_C)]$ , where  $\lambda_V$  and  $\lambda_C$  denote the hazard rates for the HIL-214 and Placebo arms respectively, obtained via a stratified Cox proportional hazards model, using Efron's method for handling ties. The model includes a term for vaccine arm and is stratified by country, whereby United States, Dominican Republic and Puerto Rico were considered one country. The 95% confidence interval is calculated by subtracting the confidence limits of hazard ratio from 1.

c. Sensitivity analyses of primary, secondary, and exploratory efficacy endpoints (unshaded column): Vaccine efficacy is defined  $100\%[1 - (IRR)]$ , where IRR is the Incidence Rate Ratio, calculated as the exponent of the coefficient of the trial arm group in a Poisson regression model with log-transformed time to event variable and adjusted by country, whereby United States, Dominican Republic and Puerto Rico were considered one country. The 95% confidence interval of the IRR is also based on the Poisson distribution.

Abbreviations: AGE, acute gastroenteritis; GE, gastroenteritis; CI, confidence interval; mFAS, modified Full Analysis Set

118 **Table S5. Distribution of participants included in GII.4 sNAb breadth analyses among participants with a**  
 119 **first GII.4-associated AGE event through the 6-month AGE surveillance period, stratified by variant,**  
 120 **severity, and country in the NOR-212 study.**

| Category, n (%)      | Number of participants, n/N (%) <sup>a, b</sup>                           |                      |                      |                      |                        |                      |
|----------------------|---------------------------------------------------------------------------|----------------------|----------------------|----------------------|------------------------|----------------------|
|                      | 6 mos AGE surveillance; Included (AGE > Visit 3 < Visit 4)/Total Observed |                      |                      |                      |                        |                      |
|                      | Mod/Sev GII.4 AGE                                                         |                      | Mild GII.4 AGE       |                      | Mild/Mod/Sev GII.4 AGE |                      |
|                      | HIL-214<br>(N=16/23)                                                      | Placebo<br>(N=12/26) | HIL-214<br>(N=10/16) | Placebo<br>(N=12/18) | HIL-214<br>(N=26/39)   | Placebo<br>(N=24/44) |
| <b>GII.4 variant</b> |                                                                           |                      |                      |                      |                        |                      |
| <b>GII.4_SF</b>      | <b>5/7 (71)</b>                                                           | <b>5/12 (42)</b>     | <b>8/12 (67)</b>     | <b>6/10 (60)</b>     | <b>13/19 (68)</b>      | <b>11/22 (50)</b>    |
| Panama               | 5/7 (71)                                                                  | 3/6 (50)             | 6/9 (67)             | 5/8 (63)             | 11/16 (69)             | 8/14 (57)            |
| Dominican Republic   | 0                                                                         | 0                    | 0                    | 0                    | 0                      | 0                    |
| Honduras             | 0                                                                         | 1/5 (20)             | 0/1 (0)              | 0/1 (0)              | 0/1 (0)                | 1/6 (17)             |
| Peru                 | 0                                                                         | 0                    | 2/2 (100)            | 0                    | 2/2 (100)              | 0                    |
| Colombia             | 0                                                                         | 1/1 (100)            | 0                    | 1/1 (0)              | 0                      | 2/2 (100)            |
| Puerto Rico          | 0                                                                         | 0                    | 0                    | 0                    | 0                      | 0                    |
| United States        | 0                                                                         | 0                    | 0                    | 0                    | 0                      | 0                    |
| <b>GII.4_SY</b>      | <b>7/8 (88)</b>                                                           | <b>6/10 (60)</b>     | <b>1/1 (100)</b>     | <b>4/4 (100)</b>     | <b>8/9 (89)</b>        | <b>10/14 (71)</b>    |
| Panama               | 6/7 (86)                                                                  | 3/6 (5)              | 1/1 (100)            | 3/3 (100)            | 7/8 (88)               | 6/9 (67)             |
| Dominican Republic   | 0                                                                         | 1/2 (50)             | 0                    | 0                    | 0                      | 1/2 (50)             |
| Honduras             | 1/1 (100)                                                                 | 0                    | 0                    | 1/1 (100)            | 1/1 (100)              | 1/1 (100)            |
| Peru                 | 0                                                                         | 0                    | 0                    | 0                    | 0                      | 0                    |
| Colombia             | 0                                                                         | 2/2 (100)            | 0                    | 0                    | 0                      | 2/2 (100)            |
| Puerto Rico          | 0                                                                         | 0                    | 0                    | 0                    | 0                      | 0                    |
| United States        | 0                                                                         | 0                    | 0                    | 0                    | 0                      | 0                    |
| <b>GII.4_WI</b>      | <b>4/7 (57)</b>                                                           | <b>0/2 (0)</b>       | <b>1/1 (100)</b>     | <b>2/3 (67)</b>      | <b>5/8 (63)</b>        | <b>2/5 (40)</b>      |
| Panama               | 0                                                                         | 0                    | 0                    | 0                    | 0                      | 0                    |
| Dominican Republic   | 0                                                                         | 0                    | 0                    | 0                    | 0                      | 0                    |
| Honduras             | 4/7 (57)                                                                  | 0/2 (0)              | 1/1 (100)            | 2/3 (67)             | 5/8 (63)               | 2/5 (40)             |
| Peru                 | 0                                                                         | 0                    | 0                    | 0                    | 0                      | 0                    |
| Colombia             | 0                                                                         | 0                    | 0                    | 0                    | 0                      | 0                    |
| Puerto Rico          | 0                                                                         | 0                    | 0                    | 0                    | 0                      | 0                    |
| United States        | 0                                                                         | 0                    | 0                    | 0                    | 0                      | 0                    |
| <b>GII.4_AL</b>      | <b>0</b>                                                                  | <b>0</b>             | <b>0/1 (0)</b>       | <b>0/1 (0)</b>       | <b>0/1 (0)</b>         | <b>0/1 (0)</b>       |
| Panama               | 0                                                                         | 0                    | 0/1 (0)              | 0/1 (0)              | 0/1 (0)                | 0/1 (0)              |
| Dominican Republic   | 0                                                                         | 0                    | 0                    | 0                    | 0                      | 0                    |
| Honduras             | 0                                                                         | 0                    | 0                    | 0                    | 0                      | 0                    |
| Peru                 | 0                                                                         | 0                    | 0                    | 0                    | 0                      | 0                    |
| Colombia             | 0                                                                         | 0                    | 0                    | 0                    | 0                      | 0                    |
| Puerto Rico          | 0                                                                         | 0                    | 0                    | 0                    | 0                      | 0                    |
| United States        | 0                                                                         | 0                    | 0                    | 0                    | 0                      | 0                    |
| <b>GII.4_N/A</b>     | <b>0/1 (0)</b>                                                            | <b>1/2 (50)</b>      | <b>0/1 (0)</b>       | <b>0</b>             | <b>0/2 (0)</b>         | <b>1/2 (50)</b>      |
| Panama               | 0/1 (0)                                                                   | 1/2 (50)             | 0/1 (0)              | 0                    | 0/2                    | 1/2 (50)             |
| Dominican Republic   | 0                                                                         | 0                    | 0                    | 0                    | 0                      | 0                    |
| Honduras             | 0                                                                         | 0                    | 0                    | 0                    | 0                      | 0                    |
| Peru                 | 0                                                                         | 0                    | 0                    | 0                    | 0                      | 0                    |
| Colombia             | 0                                                                         | 0                    | 0                    | 0                    | 0                      | 0                    |
| Puerto Rico          | 0                                                                         | 0                    | 0                    | 0                    | 0                      | 0                    |
| United States        | 0                                                                         | 0                    | 0                    | 0                    | 0                      | 0                    |

121  
 122 a. Among the 39 HIL-214 recipients that experienced a GII.4-associated AGE event of any severity through 6-months AGE  
 123 surveillance, 28 of 39 (71.8%) occurred after Visit 3 and before Visit 4 (16 mod/sev, 12 mild) and 26 of 28 (92.9%) had serum  
 124 available for GII.4 sNAbT breadth evaluation.

125 b. Among the 44 placebo recipients that experienced a GII.4-associated AGE event of any severity through 6-months AGE  
126 surveillance, 29 of 44 (65.9%) occurred after Visit 3 and before Visit 4 (16 mod/sev, 13 mild) and 24 of 29 (82.7%) had serum  
127 available for analysis.  
128 Abbreviations: AGE, acute gastroenteritis; AL, Allegany; N/A, not typeable; SF, San Francisco; SY, Sydney; WI, Wichita

129  
130  
131

**Table S6. Vaccine efficacy against second AGE events by norovirus genotype/genogroup and symptom severity, excluding other GE pathogens during the 6-month and ~16-month AGE surveillance periods in the NOR-212 study (mFAS).**

| Norovirus genotypes or genogroups                       | AGE symptom severity | Number of Participants with Events, n (%) |                          |                        |                          | Vaccine efficacy, <sup>h,i</sup> % (95% CI) |                          |
|---------------------------------------------------------|----------------------|-------------------------------------------|--------------------------|------------------------|--------------------------|---------------------------------------------|--------------------------|
|                                                         |                      | HIL-214 (N=1425)                          |                          | Placebo (N=1399)       |                          | 6 mos AGE surveillance                      | ~16 mos AGE surveillance |
|                                                         |                      | 6 mos AGE surveillance                    | ~16 mos AGE surveillance | 6 mos AGE surveillance | ~16 mos AGE surveillance |                                             |                          |
| <b>First GI.1 or GII.4<sup>a</sup></b>                  | <b>Mod/Sev</b>       | <b>23 (1.6)</b>                           | <b>44 (3.1)</b>          | <b>26 (1.9)</b>        | <b>41 (2.9)</b>          | <b>13 (-53 to 50)</b>                       | <b>-5 (-61 to 31)</b>    |
| <b>First GII.4, N<sub>1</sub><sup>a</sup></b>           | <b>Mod/Sev</b>       | <b>23 (1.6)</b>                           | <b>44 (3.1)</b>          | <b>26 (1.9)</b>        | <b>41 (2.9)</b>          | <b>13 (-53 to 50)</b>                       | <b>-5 (-61 to 31)</b>    |
| Second GII.4 <sup>b</sup>                               | Mod/Sev              | 0                                         | 0                        | 1 (3.8)                | 1 (2.4)                  | N/A                                         | N/A                      |
| Second GII.4 <sup>b</sup>                               | Mild                 | 1 (4.3)                                   | 1 (2.3)                  | 1 (3.8)                | 1 (2.4)                  | -27 (-1934 to 92)                           | -4 (1564 to 93)          |
| Second GII.4 <sup>b</sup>                               | Mild/Mod/Sev         | 1 (4.3)                                   | 1 (2.3)                  | 2 (7.7)                | 2 (4.8)                  | 36 (-602 to 94)                             | 48 (-474 to 95)          |
| Second GII (non-GII.4) <sup>b</sup>                     | Mod/Sev              | 0                                         | 0                        | 1 (3.8)                | 3 (6.8)                  | NE                                          | NE                       |
| Second GII (non-GII.4) <sup>b</sup>                     | Mild                 | 0                                         | 0                        | 0                      | 0                        | NE                                          | NE                       |
| Second GII (non-GII.4) <sup>b</sup>                     | Mild/Mod/Sev         | 0                                         | 0                        | 1 (3.8)                | 3 (6.8)                  | NE                                          | NE                       |
| <b>First GI.1 or GII.4<sup>a</sup></b>                  | <b>Mild</b>          | <b>16 (1.1)</b>                           | <b>25 (1.8)</b>          | <b>18 (1.3)</b>        | <b>22 (1.6)</b>          | <b>12 (-72 to 55)</b>                       | <b>-11 (-97 to 37)</b>   |
| <b>First GII.4, N<sub>2</sub><sup>a</sup></b>           | <b>Mild</b>          | <b>16 (1.1)</b>                           | <b>25 (1.8)</b>          | <b>18 (1.3)</b>        | <b>22 (1.6)</b>          | <b>12 (-72 to 55)</b>                       | <b>-11 (-97 to 37)</b>   |
| Second GII.4 <sup>c</sup>                               | Mod/Sev              | 0                                         | 0                        | 0                      | 0                        | NE                                          | NE                       |
| Second GII.4 <sup>c</sup>                               | Mild                 | 1 (6.3)                                   | 1 (4.0)                  | 0                      | 0                        | NE                                          | NE                       |
| Second GII.4 <sup>c</sup>                               | Mild/Mod/Sev         | 1 (6.3)                                   | 1 (4.0)                  | 0                      | 0                        | NE                                          | NE                       |
| Second GII (non-GII.4) <sup>c</sup>                     | Mod/Sev              | 0                                         | 1 (4.0)                  | 0                      | 1 (4.3)                  | NE                                          | 6 (-1410 to 94)          |
| Second GII (non-GII.4) <sup>c</sup>                     | Mild                 | 0                                         | 3 (12.0)                 | 0                      | 1 (4.3)                  | NE                                          | -183 (-2624 to 71)       |
| Second GII (non-GII.4) <sup>c</sup>                     | Mild/Mod/Sev         | 0                                         | 4 (16.0)                 | 0                      | 2 (8.7)                  | NE                                          | -89 (-931 to 65)         |
| <b>First GI.1 or GII.4<sup>a</sup></b>                  | <b>Mild/Mod/Sev</b>  | <b>39 (2.7)</b>                           | <b>70 (4.9)</b>          | <b>43 (3.1)</b>        | <b>63 (4.5)</b>          | <b>11 (-38 to 42)</b>                       | <b>-9 (-53 to 23)</b>    |
| <b>First GII.4, N<sub>3</sub><sup>a</sup></b>           | <b>Mild/Mod/Sev</b>  | <b>39 (2.7)</b>                           | <b>70 (4.9)</b>          | <b>43 (3.1)</b>        | <b>63 (4.5)</b>          | <b>11 (-38 to 42)</b>                       | <b>-9 (-53 to 23)</b>    |
| Second GII.4 <sup>d</sup>                               | Mod/Sev              | 0                                         | 0                        | 1 (2.3)                | 1 (1.5)                  | NE                                          | NE                       |
| Second GII.4 <sup>d</sup>                               | Mild                 | 2 (5.1)                                   | 2 (2.9)                  | 1 (2.3)                | 1 (1.5)                  | -164 (-2816 to 76)                          | -101 (-2113 to 82)       |
| Second GII.4 <sup>d</sup>                               | Mild/Mod/Sev         | 2 (5.1)                                   | 2 (2.9)                  | 2 (4.5)                | 2 (3.1)                  | -32 (-839 to 81)                            | 0 (-612 to 86)           |
| Second GII (non-GII.4) <sup>d</sup>                     | Mod/Sev              | 0                                         | 1 (1.4)                  | 1 (2.3)                | 4 (6.2)                  | NE                                          | 75 (-124 to 97)          |
| Second GII (non-GII.4) <sup>d</sup>                     | Mild                 | 0                                         | 3 (4.3)                  | 0                      | 1 (1.5)                  | NE                                          | -201 (-2793 to 69)       |
| Second GII (non-GII.4) <sup>d</sup>                     | Mild/Mod/Sev         | 0                                         | 4 (5.8)                  | 1 (2.3)                | 5 (7.7)                  | NE                                          | 20 (-199 to 78)          |
| <b>First GI or GII<sup>a</sup></b>                      | <b>Mod/Sev</b>       | <b>43 (3.0)</b>                           | <b>80 (5.6)</b>          | <b>51 (3.6)</b>        | <b>85 (6.1)</b>          | <b>17 (-25 to 45)</b>                       | <b>9 (-24 to 33)</b>     |
| <b>First GII<sup>a</sup></b>                            | <b>Mod/Sev</b>       | <b>40 (2.8)</b>                           | <b>77 (5.4)</b>          | <b>42 (3.0)</b>        | <b>83 (5.9)</b>          | <b>6 (-45 to 39)</b>                        | <b>8 (-26 to 32)</b>     |
| <b>First GII (non-GII.4), N<sub>4</sub><sup>a</sup></b> | <b>Mod/Sev</b>       | <b>16 (1.1)</b>                           | <b>31 (2.2)</b>          | <b>17 (1.2)</b>        | <b>35 (2.5)</b>          | <b>8 (-83 to 53)</b>                        | <b>14 (-40 to 47)</b>    |
| Second GII.4 <sup>e</sup>                               | Mod/Sev              | 0                                         | 1 (3.0)                  | 0                      | 1 (2.4)                  | NE                                          | -21 (-1833 to 92)        |
| Second GII.4 <sup>e</sup>                               | Mild                 | 0                                         | 0                        | 0                      | 0                        | NE                                          | NE                       |
| Second GII.4 <sup>e</sup>                               | Mild/Mod/Sev         | 0                                         | 1 (3.0)                  | 0                      | 1 (2.4)                  | NE                                          | -21 (-1833 to 92)        |
| Second GII (non-GII.4) <sup>e</sup>                     | Mod/Sev              | 0                                         | 2 (6.1)                  | 0                      | 1 (2.4)                  | NE                                          | -142 (-2567 to 78)       |
| Second GII (non-GII.4) <sup>e</sup>                     | Mild                 | 0                                         | 0                        | 0                      | 0                        | NE                                          | NE                       |

|                                                         |                     |                 |                   |                  |                   |                       |                       |
|---------------------------------------------------------|---------------------|-----------------|-------------------|------------------|-------------------|-----------------------|-----------------------|
| Second GII (non-GII.4) <sup>e</sup>                     | Mild/Mod/Sev        | 0               | 2 (6.1)           | 0                | 1 (2.4)           | NE                    | -142 (-2567 to 78)    |
| <b>First GI or GII<sup>a</sup></b>                      | <b>Mild</b>         | <b>46 (3.2)</b> | <b>76 (5.3)</b>   | <b>55 (3.9)</b>  | <b>76 (5.4)</b>   | <b>18 (-22 to 44)</b> | <b>2 (-34 to 29)</b>  |
| <b>First GII<sup>a</sup></b>                            | <b>Mild</b>         | <b>28 (2.0)</b> | <b>64 (4.5)</b>   | <b>42 (3.0)</b>  | <b>61 (4.4)</b>   | <b>31 (-12 to 57)</b> | <b>-4 (-47 to 27)</b> |
| <b>First GII (non-GII.4), N<sub>5</sub><sup>a</sup></b> | <b>Mild</b>         | <b>14 (1.0)</b> | <b>31 (2.2)</b>   | <b>23 (1.6)</b>  | <b>38 (2.7)</b>   | <b>40 (-16 to 69)</b> | <b>20 (-28 to 50)</b> |
| Second GII.4 <sup>f</sup>                               | Mod/Sev             | 0               | 0                 | 0                | 1 (2.6)           | NE                    | NE                    |
| Second GII.4 <sup>f</sup>                               | Mild                | 1 (8.3)         | 1 (2.8)           | 2 (12.5)         | 2 (5.3)           | 15 (-838 to 92)       | 44 (-522 to 95)       |
| Second GII.4 <sup>f</sup>                               | Mild/Mod/Sev        | 1 (8.3)         | 1 (2.8)           | 0                | 3 (7.9)           | NE                    | 62 (-261 to 96)       |
| Second GII (non-GII.4) <sup>f</sup>                     | Mod/Sev             | 1 (8.3)         | 1 (2.8)           | 0                | 1 (2.6)           | NE                    | -13 (-1703 to 93)     |
| Second GII (non-GII.4) <sup>f</sup>                     | Mild                | 0               | 3 (8.3)           | 0                | 1 (2.6)           | NE                    | -238 (-3153 to 65)    |
| Second GII (non-GII.4) <sup>f</sup>                     | Mild/Mod/Sev        | 1 (8.3)         | 4 (11.1)          | 0                | 2 (5.3)           | NE                    | -351 (-3936 to 50)    |
| <b>First GI or GII<sup>a</sup></b>                      | <b>Mild/Mod/Sev</b> | <b>88 (6.2)</b> | <b>149 (10.4)</b> | <b>103 (7.4)</b> | <b>152 (10.9)</b> | <b>16 (-11 to 37)</b> | <b>5 (-19 to 24)</b>  |
| <b>First GII<sup>a</sup></b>                            | <b>Mild/Mod/Sev</b> | <b>68 (4.8)</b> | <b>141 (9.9)</b>  | <b>42 (3.0)</b>  | <b>144 (10.3)</b> | <b>18 (-13 to 41)</b> | <b>3 (-23 to 23)</b>  |
| <b>First GII (non-GII.4), N<sub>6</sub><sup>a</sup></b> | <b>Mild/Mod/Sev</b> | <b>29 (2.0)</b> | <b>60 (4.2)</b>   | <b>39 (2.8)</b>  | <b>80 (5.7)</b>   | <b>27 (-18 to 55)</b> | <b>27 (-2 to 48)</b>  |
| Second GII.4 <sup>g</sup>                               | Mod/Sev             | 0               | 1 (1.4)           | 0                | 2 (2.5)           | NE                    | 42 (-545 to 95)       |
| Second GII.4 <sup>g</sup>                               | Mild                | 1 (3.4)         | 1 (1.4)           | 2 (12.5)         | 2 (2.5)           | 33 (-643 to 94)       | 42 (-545 to 95)       |
| Second GII.4 <sup>g</sup>                               | Mild/Mod/Sev        | 1 (3.4)         | 2 (2.9)           | 0                | 4 (5.1)           | NE                    | 42 (-219 to 89)       |
| Second GII (non-GII.4) <sup>g</sup>                     | Mod/Sev             | 1 (3.4)         | 3 (4.3)           | 0                | 2 (2.5)           | NE                    | -75 (-950 to 71)      |
| Second GII (non-GII.4) <sup>g</sup>                     | Mild                | 0               | 3 (4.3)           | 0                | 1 (1.3)           | NE                    | -251 (-3274 to 63)    |
| Second GII (non-GII.4) <sup>g</sup>                     | Mild/Mod/Sev        | 1 (3.4)         | 6 (8.7)           | 0                | 3 (3.8)           | NE                    | -134 (-835 to 41)     |

132 a. Percentage (%) = n/N.

133 b. Percentage (%) = n/N<sub>1</sub>.

134 c. Percentage (%) = n/N<sub>2</sub>.

135 d. Percentage (%) = n/N<sub>3</sub>.

136 e. Percentage (%) = n/N<sub>4</sub>.

137 f. Percentage (%) = n/N<sub>5</sub>.

138 g. Percentage (%) = n/N<sub>6</sub>.

139 h. Primary, secondary, and exploratory efficacy endpoint analyses (grey shaded rows): Vaccine efficacy is defined  $100\%[1 - (\lambda_V/\lambda_C)]$ , where  $\lambda_V$  and  $\lambda_C$  denote the hazard rates for the HIL-214 and Placebo arms respectively, obtained via a stratified Cox proportional hazards model, using Efron's method for handling ties. The model includes a term for vaccine arm and is stratified by country, whereby United States, Dominican Republic and Puerto Rico were considered one country. The 95% confidence interval is calculated by subtracting the confidence limits of hazard ratio from 1.

140 i. Post-hoc exploratory efficacy analyses (unshaded rows): Vaccine efficacy is defined  $100\%[1 - (IRR)]$ , where IRR is the Incidence Rate Ratio, calculated as the exponent of the coefficient of the trial arm group in a Poisson regression model with log-transformed time to event variable and adjusted by country, whereby United States, Dominican Republic and Puerto Rico were considered one country. The 95% confidence interval of the IRR is also based on the Poisson distribution.

141 Abbreviations: AGE, acute gastroenteritis; GE, gastroenteritis; CI, confidence interval; mFAS, modified Full Analysis Set; NE, not estimable.

142

143

144

145

146

147

148

149

150 **NOR-212: Safety**

151 **Table S7. Incidence of adverse events after any dose during the 6-month and ~16-month AGE surveillance**  
 152 **periods in the NOR-212 study (SAF).**

153

| Adverse Event (AE) category, n (%)                                | Number of Participants, n (%) |                             |                           |                             |
|-------------------------------------------------------------------|-------------------------------|-----------------------------|---------------------------|-----------------------------|
|                                                                   | HIL-214<br>(N=1541)           |                             | Placebo<br>(N=1537)       |                             |
|                                                                   | 6 mos AGE<br>surveillance     | ~16 mos AGE<br>surveillance | 6 mos AGE<br>surveillance | ~16 mos AGE<br>surveillance |
| <b>Any AE<sup>a</sup></b>                                         | 938 (60.9)                    | 944 (61.3)                  | 937 (61.0)                | 945 (61.5)                  |
| <b>Any solicited local reactions<sup>b</sup></b>                  | 161 (10.4)                    | 169 (11.0)                  | 103 (6.7)                 | 109 (7.1)                   |
| <b>Any solicited systemic AE</b>                                  | 581 (37.7)                    | 614 (39.8)                  | 540 (35.2)                | 560 (36.5)                  |
| Trial-vaccine related <sup>b</sup> solicited systemic AE          | 513 (33.3)                    | 513 (33.3)                  | 460 (29.9)                | 460 (29.9)                  |
| <b>Any unsolicited systemic AE<sup>c</sup></b>                    | 903 (58.6)                    | 902 (58.5)                  | 890 (57.9)                | 889 (57.9)                  |
| Any trial-vaccine related <sup>b</sup> unsolicited systemic AE    | 18 (1.2)                      | 10 (0.6)                    | 19 (1.2)                  | 14 (0.9)                    |
| <b>Any serious AE (SAE)<sup>d</sup></b>                           | 145 (9.4)                     | 169 (11.0)                  | 132 (8.6)                 | 165 (10.7)                  |
| Any trial-vaccine related <sup>b</sup> SAE                        | 0                             | 0                           | 1 (<0.1)                  | 1 (<0.1)                    |
| <b>AE leading to trial vaccine discontinuation<sup>d, e</sup></b> | 2 (0.1)                       | 2 (0.1)                     | 0                         | 0                           |
| <b>AE leading to trial discontinuation<sup>d, e</sup></b>         | 2 (0.1)                       | 2 (0.1)                     | 2 (0.1)                   | 2 (0.1)                     |
| <b>AE leading to death<sup>d, e</sup></b>                         | 2 (0.1)                       | 2 (0.1)                     | 1 (<0.1)                  | 1 (<0.1)                    |

154

155 a. Includes only AEs collected in the AE form; for solicited local reactions and systemic AEs includes events which only occurred  
 156 within 30 minutes of dosing.

157 b. Considered related if assessed as being possibly caused by the trial vaccine up to 7 days after vaccination.

158 c. As assessed up to 28 days after each vaccination.

159 d. As assessed throughout trial.

160 e. None were considered related to the trial vaccine.

161 Abbreviations: AE, adverse event; mos, months; SAE, serious adverse event; SAF, Safety Analysis Set.

162

163 **NOR-212: Immunogenicity**

164 **Table S8. GI.1 and GII.4c-specific sNAbT (HBGA-blocking) and pan-Ig GMCs and GMFRs in participants who received HIL-214 or placebo in the**  
 165 **NOR-212 study (FAS).**

166

| Antigen                         | Visit <sup>a</sup> | HIL-214<br>(N=1540) |                           |                  | Placebo<br>(N=1537) |                     |               |
|---------------------------------|--------------------|---------------------|---------------------------|------------------|---------------------|---------------------|---------------|
|                                 |                    | N <sub>E</sub>      | GMC (95% CI)              | GMFR (95% CI)    | N <sub>E</sub>      | GMC (95% CI)        | GMFR (95% CI) |
| <b>HBGA-blocking antibodies</b> |                    |                     |                           |                  |                     |                     |               |
| GI.1                            | Visit 1/Day 1      | 1538                | 21.0 (20.6-21.4)          | –                | 1529                | 20.9 (20.5-21.3)    | –             |
|                                 | Visit 2/Day 43     | 1446                | 60.8 (58.3-63.5)          | 2.9 (2.8-3.0)    | 1417                | 21.6 (21.0-22.1)    | 1.0 (1.0-1.0) |
|                                 | Visit 3/Day 71     | 1415                | 421.2 (404.8-438.3)       | 20.1 (19.2-21.1) | 1396                | 21.8 (21.2-22.4)    | 1.0 (1.0-1.1) |
|                                 | Visit 4/Day 210    | 1392                | 165.7 (159.7-171.8)       | 7.9 (7.6-8.2)    | 1377                | 21.7 (21.1-22.3)    | 1.0 (1.0-1.1) |
|                                 | Visit 5/Day 390    | 1248                | 100.1 (95.8-104.6)        | 4.8 (4.5-5.0)    | 1300                | 21.7 (21.2-22.2)    | 1.0 (1.0-1.1) |
|                                 | Visit 6/Day 570    | 453                 | 88.3 (82.1-94.9)          | 4.2 (3.9-4.5)    | 460                 | 21.8 (20.9-22.8)    | 1.0 (1.0-1.1) |
| GII.4c                          | Visit 1/Day 1      | 1539                | 37.7 (37.0-38.4)          | –                | 1529                | 39.2 (38.3-40.2)    | –             |
|                                 | Visit 2/Day 43     | 1451                | 49.6 (47.8-51.4)          | 1.3 (1.3-1.4)    | 1417                | 39.8 (38.8-40.9)    | 1.0 (0.9-1.0) |
|                                 | Visit 3/Day 71     | 1417                | 121.9 (115.8-128.2)       | 3.2 (3.1-3.4)    | 1396                | 41.0 (39.8-42.2)    | 1.0 (1.0-1.1) |
|                                 | Visit 4/Day 210    | 1400                | 85.5 (81.4-89.7)          | 2.3 (2.2-2.4)    | 1377                | 45.6 (44.1-47.2)    | 1.2 (1.1-1.2) |
|                                 | Visit 5/Day 390    | 60                  | 111.0 (83.9-146.8)        | 3.0 (2.3-4.0)    | 72                  | 51.7 (43.6-61.2)    | 1.4 (1.2-1.7) |
|                                 | Visit 6/Day 570    | 0                   | –                         | –                | 0                   | –                   | –             |
| <b>Pan-Ig</b>                   |                    |                     |                           |                  |                     |                     |               |
| GI.1                            | Visit 1/Day 1      | 1536                | 116.3 (112.9-119.8)       | –                | 1528                | 110.9 (107.9-114.0) | –             |
|                                 | Visit 2/Day 43     | 1450                | 1611.0 (1540.8-1684.5)    | 13.9 (13.1-14.7) | 1417                | 95.9 (93.6-98.4)    | 0.9 (0.8-0.9) |
|                                 | Visit 3/Day 71     | 1416                | 10419.5 (10031.8-10822.2) | 89.9 (85.2-94.7) | 1397                | 95.4 (92.5-98.4)    | 0.9 (0.8-0.9) |
|                                 | Visit 4/Day 210    | 1399                | 3653.7 (3522.2-3790.1)    | 31.4 (29.9-33.0) | 1378                | 118.3 (113.3-123.6) | 1.1 (1.0-1.1) |
|                                 | Visit 5/Day 390    | 825                 | 1667.1 (1594.3-1743.2)    | 14.1 (13.3-15.0) | 1029                | 147.5 (139.2-156.2) | 1.3 (1.2-1.4) |
|                                 | Visit 6/Day 570    | 331                 | 1631.0 (1524.7-1744.7)    | 14.6 (13.2-16.2) | 373                 | 152.7 (139.0-167.8) | 1.5 (1.3-1.6) |
| GII.4c                          | Visit 1/Day 1      | 1536                | 111.8 (107.1-116.8)       | –                | 1528                | 114.7 (109.5-120.0) | –             |
|                                 | Visit 2/Day 43     | 1451                | 321.4 (302.5-341.5)       | 2.9 (2.7-3.1)    | 1416                | 99.6 (94.5-105.0)   | 0.9 (0.8-0.9) |
|                                 | Visit 3/Day 71     | 1418                | 1652.8 (1564.0-1746.7)    | 14.8 (13.8-15.8) | 1397                | 105.3 (99.2-111.8)  | 0.9 (0.9-1.0) |
|                                 | Visit 4/Day 210    | 1401                | 1081.0 (1020.4-1145.2)    | 9.6 (9.0-10.3)   | 1378                | 178.0 (164.1-193.1) | 1.6 (1.4-1.7) |
|                                 | Visit 5/Day 390    | 813                 | 499.9 (468.6-533.3)       | 4.8 (4.4-5.2)    | 905                 | 171.8 (158.5-186.3) | 1.6 (1.5-1.7) |
|                                 | Visit 6/Day 570    | 276                 | 501.9 (450.8-558.7)       | 4.8 (4.1-5.6)    | 303                 | 230.4 (199.4-266.2) | 2.2 (1.9-2.6) |

167

168

169

170

171

a. Fewer HIL-214 and placebo recipients were tested beyond Visit 4 following early trial termination by the sponsor.

Abbreviations: N<sub>E</sub>, number of participants with evaluable samples; CI, confidence interval; GMC, geometric mean concentration; GMFR, geometric mean fold-rise; HBGA, histo-blood group antigen (where HBGA refers to HBGA-blocking antibody under Ab type).

172 **Table S9. Seroresponse rates (SRRs) of GI.1 and GII.4c-specific HBGA-blocking antibodies (sNAb) in**  
 173 **participants who received HIL-214 or placebo in the NOR-212 study (FAS).**

174

| Visit <sup>b</sup>                                               | GI.1                |                     | GII.4c              |                     |
|------------------------------------------------------------------|---------------------|---------------------|---------------------|---------------------|
|                                                                  | HIL-214<br>(N=1540) | Placebo<br>(N=1537) | HIL-214<br>(N=1540) | Placebo<br>(N=1537) |
| <b>HBGA seroresponse rate, n/N<sub>E</sub> (%)<sup>a</sup></b>   |                     |                     |                     |                     |
| Visit 2/Day 43                                                   | 532/1445 (36.8)     | 9/1412 (0.6)        | 108/1450 (7.4)      | 19/1412 (1.3)       |
| Visit 3/Day 71                                                   | 1351/1414 (95.5)    | 19/1390 (1.4)       | 609/1416 (43.0)     | 31/1390 (2.2)       |
| Visit 4/Day 210                                                  | 1199/1391 (86.2)    | 22/1371 (1.6)       | 350/1399 (25.0)     | 85/1371 (6.2)       |
| Visit 5/Day 390                                                  | 745/1247 (59.7)     | 19/1293 (1.5)       | 21/60 (35.0)        | 10/72 (13.9)        |
| Visit 6/Day 570                                                  | 251/453 (55.4)      | 9/459 (2.0)         | NT                  | NT                  |
| <b>Pan-Ig seroresponse rate, n/N<sub>E</sub> (%)<sup>a</sup></b> |                     |                     |                     |                     |
| Visit 2/Day 43                                                   | 1224/1447 (84.6)    | 19/1411 (1.3)       | 549/1448 (37.9)     | 47/1410 (3.3)       |
| Visit 3/Day 71                                                   | 1399/1414 (98.9)    | 33/1390 (2.4)       | 118/1416 (83.9)     | 113/1390 (8.1)      |
| Visit 4/Day 210                                                  | 1356/1397 (97.1)    | 119/1371 (8.7)      | 1055/1398 (75.5)    | 324/1371 (23.6)     |
| Visit 5/Day 390                                                  | 747/823 (90.8)      | 143/1021 (14.0)     | 494/810 (61.0)      | 228/898 (25.4)      |
| Visit 6/Day 570                                                  | 310/331 (93.7)      | 60/372 (16.1)       | 170/275 (61.8)      | 108/303 (35.6)      |

175

176

177

178

179

a. Percentage (%) = n/N<sub>E</sub>.

b. Fewer HIL-214 and placebo recipients were tested beyond Visit 4 following early trial termination by the sponsor.

Abbreviations: FAS, Full Analysis Set; N<sub>E</sub>, number of participants with evaluable samples; NT, not tested; SRR, seroresponse rate

**NOR-212: Breadth of GII.4 immune responses following vaccination and GII.4 associated AGE**

**Table S10. Summary of participants included and excluded from GII.4 sNAb breadth analyses, stratified by variant and severity, among those with a first GII.4-associated AGE event during the 6-month AGE surveillance period in the NOR-212 study.**

| Norovirus genotypes or genogroups | AGE symptom severity | 6 mos AGE surveillance                                  |                    |                                                                                |                    |
|-----------------------------------|----------------------|---------------------------------------------------------|--------------------|--------------------------------------------------------------------------------|--------------------|
|                                   |                      | Included                                                |                    | Excluded                                                                       |                    |
|                                   |                      | (AGE >Visit 3 <Visit 4)/ Total Observed <sup>a, b</sup> |                    | (AGE >Visit 4, GII.4 sNAbT <Visit 3, or No sample)/Total Observed <sup>c</sup> |                    |
|                                   |                      | HIL-214                                                 | Placebo            | HIL-214                                                                        | Placebo            |
| <b>Any GII.4, n/N (%)</b>         | <b>Mod/Sev</b>       | <b>16/23 (70%)</b>                                      | <b>12/26 (46%)</b> | <b>7/23 (30%)</b>                                                              | <b>14/26 (54%)</b> |
| GII.4_SF                          | Mod/Sev              | 5/7                                                     | 5/12               | 2/7                                                                            | 7/12               |
| GII.4_SY                          | Mod/Sev              | 7/8                                                     | 6/10               | 1/8                                                                            | 4/10               |
| GII.4_WI                          | Mod/Sev              | 4/7                                                     | 0/2                | 3/7                                                                            | 2/2                |
| GII.4_AL                          | Mod/Sev              | 0                                                       | 0                  | 0                                                                              | 0                  |
| GII.4_N/A                         | Mod/Sev              | 0/1                                                     | 1/2                | 1/1                                                                            | 1/2                |
| <b>Any GII.4, n/N (%)</b>         | <b>Mild</b>          | <b>10/16 (63%)</b>                                      | <b>12/18 (67%)</b> | <b>6/16 (38%)</b>                                                              | <b>6/18 (33%)</b>  |
| GII.4_SF                          | Mild                 | 8/12                                                    | 6/10               | 4/12                                                                           | 4/10               |
| GII.4_SY                          | Mild                 | 1/1                                                     | 4/4                | 0/1                                                                            | 0/4                |
| GII.4_WI                          | Mild                 | 1/1                                                     | 2/3                | 0/1                                                                            | 1/3                |
| GII.4_AL                          | Mild                 | 0/1                                                     | 0/1                | 1/1                                                                            | 1/1                |
| GII.4_N/A                         | Mild                 | 0/1                                                     | 0                  | 1/1                                                                            | 0                  |
| <b>Any GII.4, n/N (%)</b>         | <b>Mild/Mod/Sev</b>  | <b>26/39 (67%)</b>                                      | <b>24/44 (55%)</b> | <b>13/39 (33%)</b>                                                             | <b>20/44 (45%)</b> |
| GII.4_SF                          | Mild/Mod/Sev         | 13/19                                                   | 11/22              | 6/19                                                                           | 11/22              |
| GII.4_SY                          | Mild/Mod/Sev         | 8/9                                                     | 10/14              | 1/9                                                                            | 4/14               |
| GII.4_WI                          | Mild/Mod/Sev         | 5/8                                                     | 2/5                | 3/8                                                                            | 3/5                |
| GII.4_AL                          | Mild/Mod/Sev         | 0/1                                                     | 0/1                | 1/1                                                                            | 1/1                |
| GII.4_N/A                         | Mild/Mod/Sev         | 0/2                                                     | 1/2                | 2/2                                                                            | 1/2                |

- a. Among the 39 HIL-214 recipients that experienced a GII.4-associated AGE event of any severity through 6-months AGE surveillance, 28 of 39 (71.8%) occurred after Visit 3 and before Visit 4 (16 mod/sev, 12 mild) and 26 of 28 (92.9%) had serum available for GII.4 sNAbT breadth evaluation.
- b. Among the 44 placebo recipients that experienced a GII.4-associated AGE event of any severity through 6-months AGE surveillance, 29 of 44 (65.9%) occurred after Visit 3 and before Visit 4 (16 mod/sev, 13 mild) and 24 of 29 (82.7%) had serum available for analysis.
- c. HIL-214 and placebo recipients that experienced a symptomatic GII.4-associated AGE event after Visit 4 but before 6-months AGE surveillance or asymptomatic GII.4 infection before Visit 3 with observable sNAbT were excluded from sNAbT breadth evaluation

195  
196

**Table S11. Summary of demographic characteristics of participants evaluated for GII.4 sNAb breadth during the 6-month AGE surveillance period in the NOR-212 study.**

| Category                         | Number of participants, n (%)         |                                                      |          |                                       |                                                      |          |
|----------------------------------|---------------------------------------|------------------------------------------------------|----------|---------------------------------------|------------------------------------------------------|----------|
|                                  | HIL-214                               |                                                      |          | Placebo                               |                                                      |          |
|                                  | FAS<br>(N=1540)                       | Included (>Visit 3 <Visit 4)                         |          | FAS<br>(N=1538)                       | Included (>Visit 3 <Visit 4)                         |          |
|                                  | GI/GII<br>AGE-<br>(N=25) <sup>a</sup> | Mild/Mod/Sev<br>GII.4 AGE+<br>(N=26) <sup>b, c</sup> |          | GI/GII<br>AGE-<br>(N=20) <sup>a</sup> | Mild/Mod/Sev<br>GII.4 AGE+<br>(N=24) <sup>b, d</sup> |          |
| <b>Age, months</b>               |                                       |                                                      |          |                                       |                                                      |          |
| Mean (SD)                        | 5.0                                   | 5.0                                                  | 4.9      | 4.9                                   | 5.1                                                  | 5.0      |
| <b>Gender, n (%)</b>             |                                       |                                                      |          |                                       |                                                      |          |
| Male                             | 763 (50)                              | 14 (44)                                              | 14 (56)  | 738 (48)                              | 12 (60)                                              | 10 (42)  |
| <b>Ethnicity, n (%)</b>          |                                       |                                                      |          |                                       |                                                      |          |
| Hispanic or Latino               | 1521 (99)                             | 25 (100)                                             | 25 (96)  | 1520 (99)                             | 20 (100)                                             | 24 (100) |
| Unknown                          | 14 (<1)                               | 0                                                    | 0        | 14 (<1)                               | 0                                                    | 0        |
| Not Hispanic or Latino           | 5 (<1)                                | 0                                                    | 1 (4)    | 4 (<1)                                | 0                                                    | 0        |
| <b>Race, n (%)</b>               |                                       |                                                      |          |                                       |                                                      |          |
| Other                            | 1429 (93)                             | 24 (96)                                              | 26 (100) | 1429 (93)                             | 18 (90)                                              | 19 (79)  |
| Not Reported                     | 72 (5)                                | 1 (4)                                                | 0        | 61 (4)                                | 2 (10)                                               | 2 (8)    |
| Unknown                          | 15 (1)                                | 0                                                    | 0        | 16 (1)                                | 0                                                    | 0        |
| Black or African American        | 10 (<1)                               | 0                                                    | 0        | 14 (<1)                               | 0                                                    | 2 (8)    |
| Multiracial                      | 10 (<1)                               | 0                                                    | 0        | 12 (<1)                               | 0                                                    | 1 (4)    |
| White                            | 3 (<1)                                | 0                                                    | 0        | 5 (<1)                                | 0                                                    | 0        |
| American Indian or Alaska Native | 0                                     | 0                                                    | 0        | 1 (<0.1)                              | 0                                                    | 0        |
| Asian                            | 1 (<0.1)                              | 0                                                    | 0        | 0                                     | 0                                                    | 0        |
| <b>Country, n (%)</b>            |                                       |                                                      |          |                                       |                                                      |          |
| Panama                           | 818 (53)                              | 11 (4)                                               | 18 (69)  | 817 (53)                              | 7 (35)                                               | 15 (63)  |
| Dominican Republic               | 310 (20)                              | 10 (40)                                              | 0        | 308 (20)                              | 9 (45)                                               | 1 (4)    |
| Honduras                         | 260 (17)                              | 2 (8)                                                | 6 (23)   | 260 (17)                              | 1 (5)                                                | 4 (17)   |
| Peru                             | 105 (7)                               | 1 (4)                                                | 2 (8)    | 105 (7)                               | 2 (10)                                               | 0        |
| Colombia                         | 43 (3)                                | 1 (4)                                                | 0        | 44 (3)                                | 1 (5)                                                | 4 (17)   |
| Puerto Rico                      | 3 (<1)                                | 0                                                    | 0        | 3 (<1)                                | 0                                                    | 0        |
| United States of America         | 1 (<0.1)                              | 0                                                    | 0        | 1 (<0.1)                              | 0                                                    | 0        |

197  
198  
199  
200  
201  
202  
203  
204  
205  
206  
207  
208  
209  
210  
211  
212

- a. Participants selected for the HIL-214 GI/GII AGE- (N=25) and placebo GI/GII AGE- (N=20) subsets included those who did not experience a GI or GII AGE event (including GII.4) of any severity during the 6-months AGE surveillance period and had no observable GII.4 sNAbT before Visit 5
- b. Participants selected for the HIL-214 GII.4 AGE+ (N=26) and placebo GII.4 AGE+ (N=24) subsets included those who experienced a GII.4 AGE event of any severity during the 6-months AGE surveillance period between Visit 3 and Visit 4 (12 mos of age), excluding those who had a GII.4 AGE event after Visit 4 but before primary analysis (~13 mos of age) or had an observable GII.4 sNAbT at Visit 3. Full distribution of all GII.4 AGE+ cases (and cases selected for GII.4 sNAbT breadth analyses) by GII.4 variant, severity, country, and treatment arm is shown in **Table S5**
- c. Among the 39 HIL-214 recipients that experienced a GII.4-associated AGE event of any severity through 6-months AGE surveillance, 28 of 39 (71.8%) occurred after Visit 3 and before Visit 4 (16 mod/sev, 12 mild) and 26 of 28 (92.9%) had serum available for GII.4 sNAbT breadth evaluation.
- d. Among the 44 placebo recipients that experienced a GII.4-associated AGE event of any severity through 6-months AGE surveillance, 29 of 44 (65.9%) occurred after Visit 3 and before Visit 4 (16 mod/sev, 13 mild) and 24 of 29 (82.7%) had serum available for GII.4 sNAbT breadth evaluation.

Abbreviations: AGE, acute gastroenteritis; FAS, Full Analysis Set.

213 **Table S12. Association between GII.4 AGE severity (mild vs. mod/sev) and GII.4 variant specific sNAbT at Visit 4 in HIL-214 and placebo**  
 214 **recipients (NOR-212).** Stratified linear regression predicting Visit 4 GII.4 sNAbT to variants adjusted for AGE severity among HIL-214 and placebo  
 215 recipients with confirmed GII.4 AGE+ events between Visits 3 and 4 (see Tables S5, S10, and S11).  $\Delta$  AGE sNAbT represents the GMT difference  
 216 (linear) in GII.4 sNAbT for mod/severe GII.4 AGE compared to mild GII.4 AGE.

217

|                    | HIL-214 (N=26) |        |         |        |          |                      | Placebo (N=24) |        |         |        |          |                      |
|--------------------|----------------|--------|---------|--------|----------|----------------------|----------------|--------|---------|--------|----------|----------------------|
|                    | $\beta$        | SE     | 95% CI  |        | $\chi^2$ | P value <sup>a</sup> | $\beta$        | SE     | 95% CI  |        | $\chi^2$ | P value <sup>b</sup> |
|                    |                |        | LL      | UL     |          |                      |                |        | LL      | UL     |          |                      |
| <b>GII.4c</b>      |                |        |         |        |          |                      |                |        |         |        |          |                      |
| $\Delta$ AGE sNAbT | 3215.8         | 2533.5 | -1749.9 | 8181.4 | 1.61     | 0.2043               | 300.0          | 286.4  | -261.4  | 861.4  | 1.10     | 0.2949               |
| <b>GII.4_SF</b>    |                |        |         |        |          |                      |                |        |         |        |          |                      |
| $\Delta$ AGE sNAbT | -317.8         | 287.1  | -880.4  | 244.9  | 1.20     | 0.2738               | 1024.5         | 887.7  | -715.4  | 2764.3 | 1.30     | 0.2549               |
| <b>GII.4_SY</b>    |                |        |         |        |          |                      |                |        |         |        |          |                      |
| $\Delta$ AGE sNAbT | 1886.7         | 1206.4 | -477.9  | 4251.3 | 2.34     | 0.1263               | 2132.2         | 1654.1 | -1109.8 | 5374.3 | 1.61     | 0.2050               |
| <b>GII.4_WI</b>    |                |        |         |        |          |                      |                |        |         |        |          |                      |
| $\Delta$ AGE sNAbT | 595.9          | 343.9  | -78.2   | 1270.0 | 2.84     | 0.0919               | 139.6          | 332.2  | -511.6  | 790.7  | 0.18     | 0.6750               |
| <b>GII.4_AL</b>    |                |        |         |        |          |                      |                |        |         |        |          |                      |
| $\Delta$ AGE sNAbT | 394.2          | 199.9  | 2.4     | 786.0  | 3.62     | 0.0569               | 677.4          | 611.5  | -521.1  | 1876.0 | 1.20     | 0.2739               |

218

219 a. P-value model statistics are shown for the overall model (two-sided tests). Models with mild vs moderate vs severe were fitted and significance of difference in GII.4  
 220 sNAbT between AGE severity subsets found no statistically significant association with GII.4 sNAbT at Visit 4.

221 Abbreviations:  $\beta$ , standardized regression coefficient; sNAbT, surrogate neutralizing antibody titer; SE, standard error; 95% CI LL, lower limit of the 95% confidence interval;  
 222 95% CI UL, upper limit of the 95% confidence interval.

223

224  
225

**Table S13. GII.4 variant-specific sNAbT at Visit 4 stratified by severity of first GII.4 AGE event and infecting GII.4 variant in HIL-214 and placebo recipients between Visits 3 and 4 (NOR-212).**

| GII.4 Variant    | GII.4 sNAbT by AGE Severity | HIL-214                |                         |                                 | Placebo                |                        |                                 |
|------------------|-----------------------------|------------------------|-------------------------|---------------------------------|------------------------|------------------------|---------------------------------|
|                  |                             | Mild                   | Mod/Sev                 | $\chi^2$ (P value) <sup>a</sup> | Mild                   | Mod/Sev                | $\chi^2$ (P value) <sup>a</sup> |
|                  |                             | GMT (95% CI)           | GMT (95% CI)            |                                 | GMT (95% CI)           | GMT (95% CI)           |                                 |
| <b>GII.4_SF</b>  |                             | <b>N=8</b>             | <b>N=5</b>              |                                 | <b>N=6</b>             | <b>N=5</b>             |                                 |
| GII.4c sNAb      |                             | 216.6<br>98.6-475.9    | 430.5<br>39.1-4741.2    | 3.53 (0.0872)                   | 34.4<br>24.2-49.1      | 30.0<br>30.0-30.0      | 0.82 (0.3893)                   |
| GII.4_SF sNAb    |                             | 1053.1<br>687.5-1613.1 | 1022.4<br>451.8-2313.4  | 0.01 (0.9104)                   | 649.6<br>264.4-1596.1  | 1087.2<br>676.3-1747.9 | 1.45 (0.2595)                   |
| GII.4_SY sNAb    |                             | 224.5<br>128.2-393.2   | 303.7<br>58.8-1568.9    | 1.59 (0.2337)                   | 65.9<br>33.2-130.8     | 133.6<br>55.6-321.0    | 3.18 (0.1080)                   |
| GII.4_WI sNAb    |                             | 215.3<br>127.9-362.6   | 303.5<br>125.5-734.1    | 1.33 (0.2736)                   | 107.3<br>48.9-235.8    | 154.5<br>102.8-232.2   | 0.78 (0.3992)                   |
| GII.4_AL sNAb    |                             | 72.7<br>35.1-150.5     | 140.9<br>22.1-897.5     | 2.61 (0.1342)                   | 34.3<br>24.3-48.3      | 30.0<br>30.0-30.0      | 0.82 (0.3893)                   |
| <b>GII.4_SY</b>  |                             | <b>N=1</b>             | <b>N=7</b>              |                                 | <b>N=4</b>             | <b>N=6</b>             |                                 |
| GII.4c sNAb      |                             | 153.4                  | 1113.5<br>200.8-6176.4  | 0.18 (0.6846)                   | 97.8<br>18.4-518.5     | 157.7<br>24.4-1019.3   | 0.57 (0.4700)                   |
| GII.4_SF sNAb    |                             | 30.0                   | 155.9<br>38.3-634.9     | 0.29 (0.6076)                   | 45.7<br>12.0-174.3     | 123.5<br>10.8-1414.9   | 0.64 (0.4460)                   |
| GII.4_SY sNAb    |                             | 605.5                  | 2030.5<br>716.1-5757.5  | 0.28 (0.6159)                   | 925.7<br>277.5-3088.6  | 2063.4<br>483.4-8807.6 | 0.86 (0.3800)                   |
| GII.4_WI sNAb    |                             | 30.0                   | 259.1<br>108.7-617.9    | 0.75 (0.4212)                   | 44.6<br>12.6-157.0     | 151.7<br>21.6-1066.6   | 0.78 (0.4025)                   |
| GII.4_AL sNAb    |                             | 60.9                   | 320.2<br>108.0-949.5    | 0.40 (0.5501)                   | 59.7<br>14.0-254.1     | 230.2<br>29.2-1813.0   | 0.74 (0.4153)                   |
| <b>GII.4_WI</b>  |                             | <b>N=1</b>             | <b>N=4</b>              |                                 | <b>N=2</b>             | <b>N=0</b>             |                                 |
| GII.4c sNAb      |                             | 98.0                   | 998.1<br>97.6-10208.8   | 0.32 (0.6123)                   | 74.9<br>8.7-647.7      | -                      | NE                              |
| GII.4_SF sNAb    |                             | 30.0                   | 95.4<br>7.8-1162.6      | 0.26 (0.6476)                   | 30.0<br>30.0-30.0      | -                      | NE                              |
| GII.4_SY sNAb    |                             | 200.3                  | 1014.5<br>212.9-4833.1  | 0.67 (0.4741)                   | 418.5<br>99.4-1763.2   | -                      | NE                              |
| GII.4_WI sNAb    |                             | 853.3                  | 2192.8<br>1017.9-4723.7 | 1.18 (0.3573)                   | 1375.1<br>809.8-2335.3 | -                      | NE                              |
| GII.4_AL sNAb    |                             | 149.1                  | 341.0<br>62.8-1851.5    | 0.26 (0.6453)                   | 73.3<br>0.0-6268166.1  | -                      | NE                              |
| <b>GII.4_AL</b>  |                             | <b>N=0</b>             | <b>N=0</b>              |                                 | <b>N=0</b>             | <b>N=0</b>             |                                 |
| GII.4c sNAb      |                             | -                      | -                       |                                 | -                      | -                      |                                 |
| GII.4_SF sNAb    |                             | -                      | -                       |                                 | -                      | -                      |                                 |
| GII.4_SY sNAb    |                             | -                      | -                       |                                 | -                      | -                      |                                 |
| GII.4_WI sNAb    |                             | -                      | -                       |                                 | -                      | -                      |                                 |
| GII.4_AL sNAb    |                             | -                      | -                       |                                 | -                      | -                      |                                 |
| <b>GII.4_N/A</b> |                             | <b>N=0</b>             | <b>N=0</b>              |                                 | <b>N=0</b>             | <b>N=1</b>             |                                 |
| GII.4c sNAb      |                             | -                      | -                       |                                 | -                      | 165.2                  | NE                              |
| GII.4_SF sNAb    |                             | -                      | -                       |                                 | -                      | 85.2                   | NE                              |
| GII.4_SY sNAb    |                             | -                      | -                       |                                 | -                      | 895.4                  | NE                              |
| GII.4_WI sNAb    |                             | -                      | -                       |                                 | -                      | 81.1                   | NE                              |
| GII.4_AL sNAb    |                             | -                      | -                       |                                 | -                      | 94.3                   | NE                              |

226  
227  
228  
229  
230

a.  $\chi^2$ , group comparisons performed using ANOVA with Tukey's HSD, corresponding P-values are shown.  
Abbreviations: AGE, acute gastroenteritis; CI, confidence interval; GMT, geometric mean titers; NE, not estimable; sNAbT, surrogate neutralizing antibody titers; -, indicates that no samples were tested in that grouping.

A

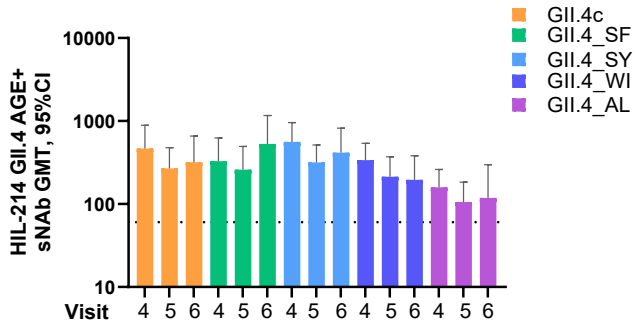

B

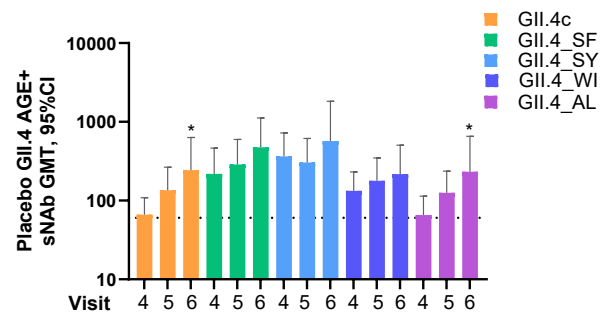

231

232

233

234

235

236

237

**Figure S2. GII.4 sNAbT breadth at Visits 4-6 in participants who experienced a first GII.4-associated AGE event between Visits 3 and Visit 4 in the NOR-212 study.** GMT (95% CI) of GII.4 sNAbT at Visit 4/Day 210 (1 year of age), Visit 5/Day 390 (18 months of age), and Visit 6/Day 570 (2 years of age). **(A)** HIL-214 GII.4 AGE+ (N=26) and **(B)** Placebo GII.4 AGE+ (N=24) participants. Dotted lines, limit of detection. \*, P < 0.02 compared to Visit 4/Day 210, Mann-Whitney test.

238  
239  
240  
241

**Table S14. Proportion of HIL-214 (aged 0.4, 0.5-<1, 1-<4, and 18<50 yrs) and placebo (aged 0.4 yrs) recipients achieving ≥4-fold increase in GII.4 sNAbT to between 0 and 5 variants, stratified by study, age group, and pre-vaccination GII.4 status (NOR-212, NOR-202, NOR-215).** These data represent the GII.4 sNAbT breadth rate visualized in Figures 3H, 5I, and S5.

|         |        |         | Data represented as percentages in Figure 3H (NOR-212) |           |          |          |          |          |    |
|---------|--------|---------|--------------------------------------------------------|-----------|----------|----------|----------|----------|----|
| n/N (%) |        |         | Number of GII.4 Variants                               |           |          |          |          | Total    |    |
|         |        |         | 0                                                      | 1         | 2        | 3        | 4        |          | 5  |
| Visit 3 | AGE    | HIL-214 | 16 (61.5)                                              | 10 (38.5) | 0 (0)    | 0 (0)    | 0 (0)    | 0 (0)    | 26 |
|         |        | Placebo | 24 (100)                                               | 0 (0)     | 0 (0)    | 0 (0)    | 0 (0)    | 0 (0)    | 24 |
|         | No AGE | HIL-214 | 12 (48.0)                                              | 13 (52.0) | 0 (0)    | 0 (0)    | 0 (0)    | 0 (0)    | 25 |
|         |        | Placebo | 20 (100)                                               | 0 (0)     | 0 (0)    | 0 (0)    | 0 (0)    | 0 (0)    | 20 |
| Visit 4 | AGE    | HIL-214 | 0 (0)                                                  | 8 (30.8)  | 3 (11.5) | 6 (23.1) | 4 (15.4) | 5 (19.2) | 26 |
|         |        | Placebo | 1 (4.2)                                                | 16 (66.7) | 5 (20.8) | 1 (4.2)  | 0 (0)    | 1 (4.2)  | 24 |
|         | No AGE | HIL-214 | 25 (100)                                               | 0 (0)     | 0 (0)    | 0 (0)    | 0 (0)    | 0 (0)    | 25 |
|         |        | Placebo | 20 (100)                                               | 0 (0)     | 0 (0)    | 0 (0)    | 0 (0)    | 0 (0)    | 20 |

|                                      |  |  | Data represented as percentages in Figure 5I (NOR-212, NOR-202, NOR-215) |           |         |          |           |           |    |
|--------------------------------------|--|--|--------------------------------------------------------------------------|-----------|---------|----------|-----------|-----------|----|
| n/N (%)                              |  |  | Number of GII.4 Variants                                                 |           |         |          |           | Total     |    |
|                                      |  |  | 0                                                                        | 1         | 2       | 3        | 4         |           | 5  |
| Pre-Vx GII.4 seronegative 0.4 yrs    |  |  | 25 (53.2)                                                                | 22 (46.8) | 0 (0)   | 0 (0)    | 0 (0)     | 0 (0)     | 47 |
| Pre-Vx GII.4 seropositive 0.4 yrs    |  |  | 3 (75.0)                                                                 | 1 (25.0)  | 0 (0)   | 0 (0)    | 0 (0)     | 0 (0)     | 4  |
| Pre-Vx GII.4 seronegative 0.5-<1 yrs |  |  | 11 (78.6)                                                                | 3 (21.4)  | 0 (0)   | 0 (0)    | 0 (0)     | 0 (0)     | 14 |
| Pre-Vx GII.4 seropositive 0.5-<1 yrs |  |  | 1 (50.0)                                                                 | 0 (0)     | 0 (0)   | 0 (0)    | 1 (50.0)  | 0 (0)     | 2  |
| Pre-Vx GII.4 seronegative 1-<4 yrs   |  |  | 19 (79.2)                                                                | 5 (20.8)  | 0 (0)   | 0 (0)    | 0 (0)     | 0 (0)     | 24 |
| Pre-Vx GII.4 seropositive 1-<4 yrs   |  |  | 1 (1.5)                                                                  | 1 (1.5)   | 2 (3.0) | 1 (1.5)  | 6 (9.0)   | 56 (83.6) | 67 |
| Pre-Vx GII.4 seronegative 4-<9 yrs   |  |  | 2 (66.7)                                                                 | 1 (33.3)  | 0 (0)   | 0 (0)    | 0 (0)     | 0 (0)     | 3  |
| Pre-Vx GII.4 seropositive 4-<9 yrs   |  |  | 0 (0)                                                                    | 0 (0)     | 0 (0)   | 0 (0)    | 0 (0)     | 21 (100)  | 21 |
| Pre-Vx GII.4 seronegative 18-<50 yrs |  |  | 11 (52.4)                                                                | 7 (33.3)  | 0 (0)   | 0 (0)    | 1 (4.8)   | 2 (9.5)   | 21 |
| Pre-Vx GII.4 seropositive 18-<50 yrs |  |  | 0 (0)                                                                    | 2 (3.6)   | 2 (3.6) | 6 (10.7) | 27 (48.2) | 19 (33.9) | 56 |

|                                      |  |  | Data represented as percentages in Figure S5 by ICH E11 age group (NOR-212, NOR-202, NOR-215) |           |         |          |           |           |    |
|--------------------------------------|--|--|-----------------------------------------------------------------------------------------------|-----------|---------|----------|-----------|-----------|----|
| n/N (%)                              |  |  | Number of GII.4 Variants                                                                      |           |         |          |           | Total     |    |
|                                      |  |  | 0                                                                                             | 1         | 2       | 3        | 4         |           | 5  |
| Pre-Vx GII.4 seronegative 0.4 yrs    |  |  | 25 (53.2)                                                                                     | 22 (46.8) | 0 (0)   | 0 (0)    | 0 (0)     | 0 (0)     | 47 |
| Pre-Vx GII.4 seropositive 0.4 yrs    |  |  | 3 (75.0)                                                                                      | 1 (25.0)  | 0 (0)   | 0 (0)    | 0 (0)     | 0 (0)     | 4  |
| Pre-Vx GII.4 seronegative 0.5-<1 yrs |  |  | 11 (78.6)                                                                                     | 3 (21.4)  | 0 (0)   | 0 (0)    | 0 (0)     | 0 (0)     | 14 |
| Pre-Vx GII.4 seropositive 0.5-<1 yrs |  |  | 1 (50.0)                                                                                      | 0 (0)     | 0 (0)   | 0 (0)    | 1 (50.0)  | 0 (0)     | 2  |
| Pre-Vx GII.4 seronegative 1-<2 yrs   |  |  | 6 (85.7)                                                                                      | 1 (14.3)  | 0 (0)   | 0 (0)    | 0 (0)     | 0 (0)     | 7  |
| Pre-Vx GII.4 seropositive 1-<2 yrs   |  |  | 0 (0)                                                                                         | 1 (7.7)   | 0 (0)   | 1 (7.7)  | 4 (33.8)  | 7 (53.8)  | 13 |
| Pre-Vx GII.4 seronegative 2-<9 yrs   |  |  | 15 (75.0)                                                                                     | 5 (25.0)  | 0 (0)   | 0 (0)    | 0 (0)     | 0 (0)     | 20 |
| Pre-Vx GII.4 seropositive 2-<9 yrs   |  |  | 1 (1.3)                                                                                       | 0 (0)     | 2 (2.7) | 0 (0)    | 2 (2.7)   | 70 (93.3) | 75 |
| Pre-Vx GII.4 seronegative 18-<50 yrs |  |  | 11 (52.4)                                                                                     | 7 (33.3)  | 0 (0)   | 0 (0)    | 1 (4.8)   | 2 (9.5)   | 21 |
| Pre-Vx GII.4 seropositive 18-<50 yrs |  |  | 0 (0)                                                                                         | 2 (3.6)   | 2 (3.6) | 6 (10.7) | 27 (48.2) | 19 (33.9) | 56 |

242

243 **Nonclinical: Sequential immunization of GII.4 naïve mice with divergent GII.4 variants improves**  
 244 **breadth**  
 245

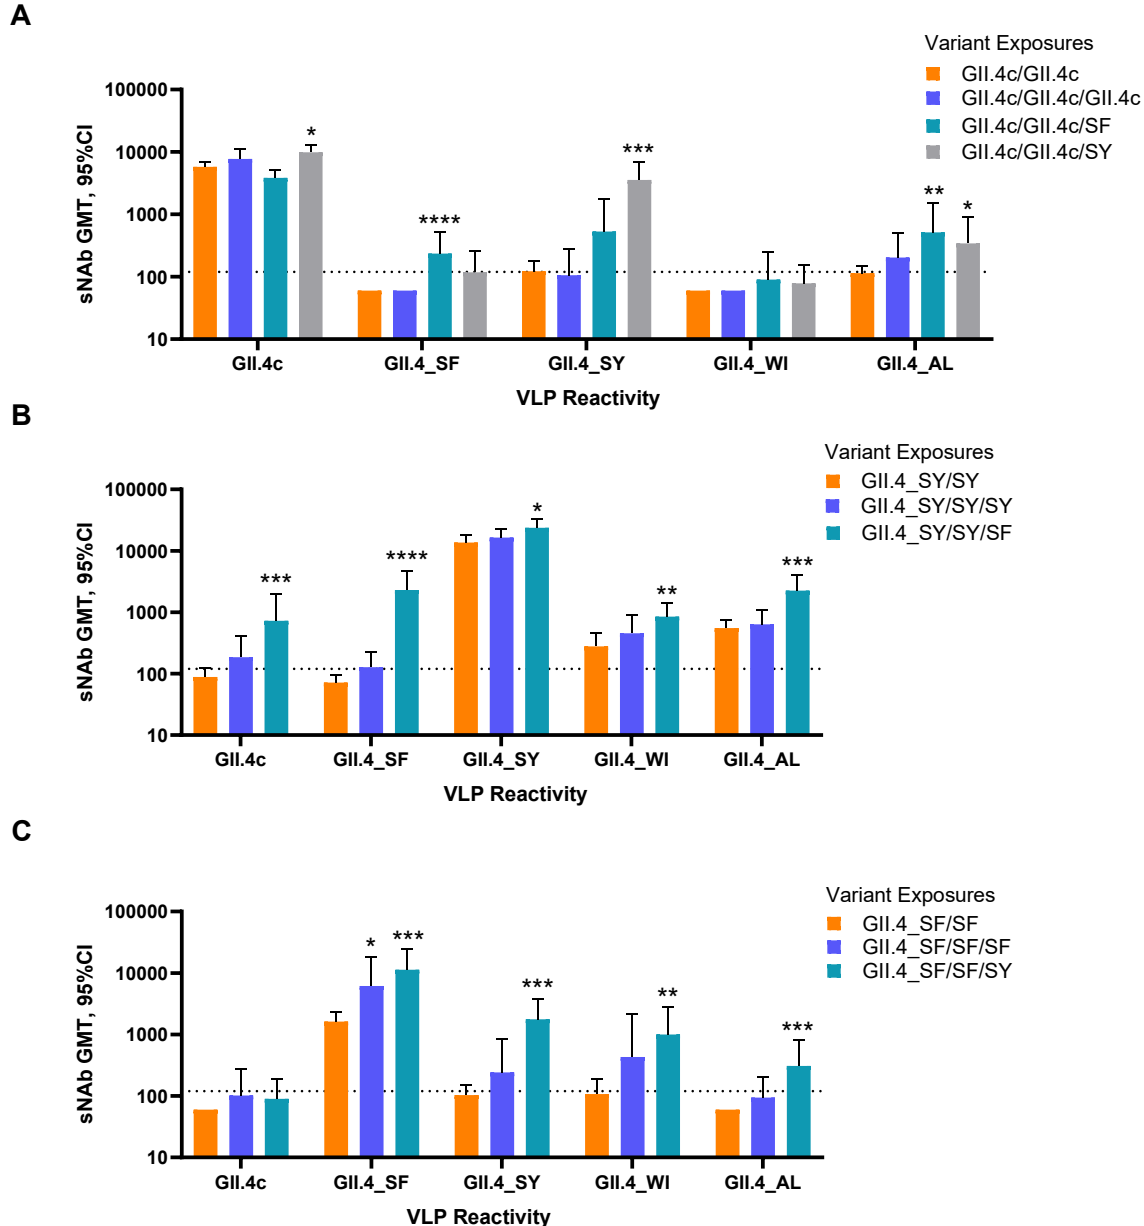

246

247 **Figure S3. GII.4 sNAb responses against heterologous variants following single or combined GII.4 variant**  
 248 **VLP immunization in human norovirus-naïve mice.** Mice were immunized with a single VLP at weeks 0 and 4  
 249 and received either a third dose of the same VLP or a single dose of a different GII.4 variant at week 8. Terminal  
 250 bleeds were collected at week 12. sNAb GMT for vaccines with **(A)** GII.4c, **(B)** GII.4\_SY, or **(C)** GII.4\_SF as the  
 251 first and second immunogen. \*,  $P < 0.05$ ; \*\*,  $P < 0.01$ ; \*\*\*,  $P < 0.001$ ; \*\*\*\*,  $P < 0.0001$  Dunn's test. Dashed line,  
 252 limit of detection.

254 **NOR-202: Patient disposition and demographics among HIL-214 vaccinated children (0.4-<9 yrs) tested for GII.4 sNAbT breadth**

255 **Table S15. Summary of demographic characteristics of children evaluated for GII.4 sNAb breadth by pre-specified and post-hoc defined age**  
 256 **groups among recipients of single dose of a HIL-214 (15/15, 15/50, 50/50, 50/150 µg) in the NOR-202 study.**

| Age Group                           |  | Number of participants, n/N (%)                                                          |     |     |     |         |     |     |     |         |     |     |   |         |     |     |     |         |     |   |     |         |   |   |   |
|-------------------------------------|--|------------------------------------------------------------------------------------------|-----|-----|-----|---------|-----|-----|-----|---------|-----|-----|---|---------|-----|-----|-----|---------|-----|---|-----|---------|---|---|---|
|                                     |  | Combined Formulations   Compositions (15/15   15/50   50/50   50/150 µg) <sup>a, b</sup> |     |     |     |         |     |     |     |         |     |     |   |         |     |     |     |         |     |   |     |         |   |   |   |
|                                     |  | Group 1 (4-<9 yr)                                                                        |     |     |     | 4-<5 yr |     |     |     | 5-<6 yr |     |     |   | 6-<7 yr |     |     |     | 7-<8 yr |     |   |     | 8-<9 yr |   |   |   |
| <b>Total n/N, (%)</b>               |  | 24/108 (22)                                                                              |     |     |     | 11      |     |     |     | 3       |     |     |   | 6       |     |     |     | 4       |     |   |     | 0       |   |   |   |
|                                     |  | 27                                                                                       | 29  | 26  | 26  | 0       | 2   | 4   | 5   | 0       | 2   | 1   | 0 | 0       | 3   | 2   | 1   | 0       | 1   | 0 | 3   | 0       | 0 | 0 | 0 |
| <b>Age, mean, n (yr)</b>            |  | 5.9                                                                                      |     |     |     | 4.7     |     |     |     | 5.7     |     |     |   | 6.7     |     |     |     | 7.5     |     |   |     | 0       |   |   |   |
|                                     |  | 5.7                                                                                      | 5.8 | 6.1 | 5.8 | 0       | 4.8 | 4.6 | 4.7 | 0       | 5.6 | 5.9 | 0 | 0       | 6.7 | 6.7 | 6.5 | 0       | 7.5 | 0 | 7.4 | 0       | 0 | 0 | 0 |
| <b>Gender, male, n/N (%)</b>        |  | 11/52 (21)                                                                               |     |     |     | 2       |     |     |     | 3       |     |     |   | 4       |     |     |     | 3       |     |   |     | 0       |   |   |   |
|                                     |  | 16                                                                                       | 12  | 11  | 13  | 0       | 1   | 0   | 1   | 0       | 2   | 1   | 0 | 0       | 2   | 1   | 1   | 0       | 0   | 0 | 2   | 0       | 0 | 0 | 0 |
| <b>Race, n/N (%)</b>                |  | 0/58 (0)                                                                                 |     |     |     | 0       |     |     |     | 0       |     |     |   | 0       |     |     |     | 0       |     |   |     | 0       |   |   |   |
| White                               |  | 15                                                                                       | 16  | 14  | 13  | 0       | 0   | 0   | 0   | 0       | 0   | 0   | 0 | 0       | 0   | 0   | 0   | 0       | 0   | 0 | 0   | 0       | 0 | 0 | 0 |
| American Indian or Alaska Native    |  | 15/37 (41)                                                                               |     |     |     | 6       |     |     |     | 3       |     |     |   | 5       |     |     |     | 1       |     |   |     | 0       |   |   |   |
|                                     |  | 9                                                                                        | 10  | 10  | 8   | 0       | 1   | 3   | 2   | 0       | 2   | 1   | 0 | 0       | 2   | 2   | 1   | 0       | 0   | 0 | 1   | 0       | 0 | 0 | 0 |
| Asian                               |  | 0                                                                                        |     |     |     | 0       |     |     |     | 0       |     |     |   | 0       |     |     |     | 0       |     |   |     | 0       |   |   |   |
|                                     |  | 0                                                                                        | 0   | 0   | 0   | 0       | 0   | 0   | 0   | 0       | 0   | 0   | 0 | 0       | 0   | 0   | 0   | 0       | 0   | 0 | 0   | 0       | 0 | 0 | 0 |
| Black or African American           |  | 2/3 (67)                                                                                 |     |     |     | 1       |     |     |     | 0       |     |     |   | 0       |     |     |     | 1       |     |   |     | 0       |   |   |   |
|                                     |  | 1                                                                                        | 0   | 0   | 2   | 0       | 0   | 0   | 1   | 0       | 0   | 0   | 0 | 0       | 0   | 0   | 0   | 0       | 0   | 0 | 1   | 0       | 0 | 0 | 0 |
| Native Hawaiian or Pacific Islander |  | 0                                                                                        |     |     |     | 0       |     |     |     | 0       |     |     |   | 0       |     |     |     | 0       |     |   |     | 0       |   |   |   |
|                                     |  | 0                                                                                        | 0   | 0   | 0   | 0       | 0   | 0   | 0   | 0       | 0   | 0   | 0 | 0       | 0   | 0   | 0   | 0       | 0   | 0 | 0   | 0       | 0 | 0 | 0 |
| Multiracial                         |  | 0                                                                                        |     |     |     | 0       |     |     |     | 0       |     |     |   | 0       |     |     |     | 0       |     |   |     | 0       |   |   |   |
|                                     |  | 0                                                                                        | 0   | 0   | 0   | 0       | 0   | 0   | 0   | 0       | 0   | 0   | 0 | 0       | 0   | 0   | 0   | 0       | 0   | 0 | 0   | 0       | 0 | 0 | 0 |
| Other                               |  | 7/10 (70)                                                                                |     |     |     | 4       |     |     |     | 0       |     |     |   | 1       |     |     |     | 2       |     |   |     | 0       |   |   |   |
|                                     |  | 2                                                                                        | 3   | 2   | 3   | 0       | 1   | 1   | 2   | 0       | 0   | 0   | 0 | 0       | 1   | 0   | 0   | 0       | 1   | 0 | 1   | 0       | 0 | 0 | 0 |
| <b>Ethnicity, n/N (%)</b>           |  | 24/50 (48)                                                                               |     |     |     | 11      |     |     |     | 3       |     |     |   | 6       |     |     |     | 4       |     |   |     | 0       |   |   |   |
| Hispanic or Latino                  |  | 12                                                                                       | 13  | 12  | 13  | 0       | 2   | 4   | 5   | 0       | 2   | 1   | 0 | 0       | 3   | 2   | 1   | 0       | 1   | 0 | 3   | 0       | 0 | 0 | 0 |
| Not reported                        |  | 0                                                                                        |     |     |     | 0       |     |     |     | 0       |     |     |   | 0       |     |     |     | 0       |     |   |     | 0       |   |   |   |
|                                     |  | 0                                                                                        | 0   | 0   | 0   | 0       | 0   | 0   | 0   | 0       | 0   | 0   | 0 | 0       | 0   | 0   | 0   | 0       | 0   | 0 | 0   | 0       | 0 | 0 | 0 |
| <b>Country, n/N (%)</b>             |  | 0/66 (0)                                                                                 |     |     |     | 0       |     |     |     | 0       |     |     |   | 0       |     |     |     | 0       |     |   |     | 0       |   |   |   |
| Finland                             |  | 16                                                                                       | 17  | 17  | 16  | 0       | 0   | 0   | 0   | 0       | 0   | 0   | 0 | 0       | 0   | 0   | 0   | 0       | 0   | 0 | 0   | 0       | 0 | 0 | 0 |
| Colombia                            |  | 7/10 (70)                                                                                |     |     |     | 4       |     |     |     | 0       |     |     |   | 1       |     |     |     | 2       |     |   |     | 0       |   |   |   |
|                                     |  | 2                                                                                        | 3   | 2   | 3   | 0       | 1   | 1   | 2   | 0       | 0   | 0   | 0 | 0       | 1   | 0   | 0   | 0       | 1   | 0 | 1   | 0       | 0 | 0 | 0 |
| Panama                              |  | 17/44 (39)                                                                               |     |     |     | 7       |     |     |     | 3       |     |     |   | 5       |     |     |     | 2       |     |   |     | 0       |   |   |   |
|                                     |  | 11                                                                                       | 10  | 11  | 12  | 0       | 1   | 3   | 3   | 0       | 2   | 1   | 0 | 0       | 2   | 2   | 1   | 0       | 0   | 0 | 2   | 0       | 0 | 0 | 0 |

257  
258

| Age Group                           | Combined Formulations   Compositions (15/15   15/50   50/50   50/150 µg) <sup>a, b</sup> |     |     |     |         |     |     |     |         |     |     |     |         |     |     |     |                    |     |     |     |           |     |     |     |
|-------------------------------------|------------------------------------------------------------------------------------------|-----|-----|-----|---------|-----|-----|-----|---------|-----|-----|-----|---------|-----|-----|-----|--------------------|-----|-----|-----|-----------|-----|-----|-----|
|                                     | Group 2/2a (1-<4 yr)                                                                     |     |     |     | 1-<2 yr |     |     |     | 2-<3 yr |     |     |     | 3-<4 yr |     |     |     | Group 3 (6-<12) mo |     |     |     | 0.5-<1 yr |     |     |     |
| <b>n/N, (%)</b>                     | <b>91/220 (41)</b>                                                                       |     |     |     | 20      |     |     |     | 47      |     |     |     | 24      |     |     |     | <b>16/108 (15)</b> |     |     |     | 16        |     |     |     |
|                                     | 54                                                                                       | 58  | 52  | 56  | 0       | 8   | 10  | 2   | 0       | 14  | 12  | 21  | 0       | 12  | 8   | 4   | 27                 | 25  | 27  | 29  | 0         | 6   | 6   | 4   |
| <b>Age, mean, n (yr)</b>            | <b>2.1</b>                                                                               |     |     |     | 1.6     |     |     |     | 2.5     |     |     |     | 3.5     |     |     |     | <b>0.7</b>         |     |     |     | 0.7       |     |     |     |
|                                     | 2.0                                                                                      | 2.2 | 1.9 | 2.1 | 0       | 1.5 | 1.5 | 1.8 | 0       | 2.5 | 2.4 | 2.5 | 0       | 3.5 | 3.5 | 3.5 | 0.6                | 0.7 | 0.7 | 0.7 | 0         | 0.7 | 0.7 | 0.7 |
| <b>Gender, male, n/N (%)</b>        | <b>53/123 (43)</b>                                                                       |     |     |     | 13      |     |     |     | 29      |     |     |     | 11      |     |     |     | <b>6/57 (11)</b>   |     |     |     | 6         |     |     |     |
|                                     | 30                                                                                       | 28  | 31  | 34  | 0       | 5   | 6   | 2   | 0       | 8   | 9   | 12  | 0       | 3   | 5   | 3   | 17                 | 11  | 14  | 15  | 0         | 2   | 1   | 2   |
| <b>Race, n/N (%)</b>                |                                                                                          |     |     |     |         |     |     |     |         |     |     |     |         |     |     |     |                    |     |     |     |           |     |     |     |
| White                               | <b>2/57 (4)</b>                                                                          |     |     |     | 0       |     |     |     | 2       |     |     |     | 0       |     |     |     | <b>0/2 (0)</b>     |     |     |     | 0         |     |     |     |
|                                     | 14                                                                                       | 14  | 12  | 17  | 0       | 0   | 0   | 0   | 0       | 1   | 0   | 1   | 0       | 0   | 0   | 0   | 1                  | 0   | 0   | 1   | 0         | 0   | 0   | 0   |
| American Indian or Alaska Native    | <b>22/39 (56)</b>                                                                        |     |     |     | 6       |     |     |     | 12      |     |     |     | 4       |     |     |     | <b>6/53 (11)</b>   |     |     |     | 6         |     |     |     |
|                                     | 11                                                                                       | 10  | 9   | 9   | 0       | 2   | 4   | 0   | 0       | 4   | 2   | 6   | 0       | 2   | 1   | 1   | 13                 | 15  | 11  | 14  | 0         | 3   | 2   | 1   |
| Asian                               | <b>0</b>                                                                                 |     |     |     | 0       |     |     |     | 0       |     |     |     | 0       |     |     |     | <b>0/1 (0)</b>     |     |     |     | 0         |     |     |     |
|                                     | 0                                                                                        | 0   | 0   | 0   | 0       | 0   | 0   | 0   | 0       | 0   | 0   | 0   | 0       | 0   | 0   | 0   | 0                  | 0   | 1   | 0   | 0         | 0   | 0   | 0   |
| Black or African American           | <b>12/18 (67)</b>                                                                        |     |     |     | 4       |     |     |     | 4       |     |     |     | 4       |     |     |     | <b>2/12 (17)</b>   |     |     |     | 2         |     |     |     |
|                                     | 3                                                                                        | 4   | 8   | 3   | 0       | 1   | 2   | 1   | 0       | 1   | 2   | 1   | 0       | 1   | 2   | 1   | 3                  | 2   | 4   | 3   | 0         | 1   | 1   | 0   |
| Native Hawaiian or Pacific Islander | <b>0</b>                                                                                 |     |     |     | 0       |     |     |     | 0       |     |     |     | 0       |     |     |     | <b>0/1 (0)</b>     |     |     |     | 0         |     |     |     |
|                                     | 0                                                                                        | 0   | 0   | 0   | 0       | 0   | 0   | 0   | 0       | 0   | 0   | 0   | 0       | 0   | 0   | 0   | 1                  | 0   | 0   | 0   | 0         | 0   | 0   | 0   |
| Multiracial                         | <b>0/2 (0)</b>                                                                           |     |     |     | 0       |     |     |     | 0       |     |     |     | 0       |     |     |     | <b>0</b>           |     |     |     | 0         |     |     |     |
|                                     | 0                                                                                        | 2   | 0   | 0   | 0       | 0   | 0   | 0   | 0       | 0   | 0   | 0   | 0       | 0   | 0   | 0   | 0                  | 0   | 0   | 0   | 0         | 0   | 0   | 0   |
| Other                               | <b>55/104 (53)</b>                                                                       |     |     |     | 10      |     |     |     | 29      |     |     |     | 16      |     |     |     | <b>8/39 (21)</b>   |     |     |     | 8         |     |     |     |
|                                     | 26                                                                                       | 28  | 23  | 27  | 0       | 5   | 4   | 1   | 0       | 8   | 8   | 13  | 0       | 9   | 5   | 2   | 9                  | 8   | 11  | 11  | 0         | 2   | 3   | 3   |
| <b>Ethnicity, n/N (%)</b>           |                                                                                          |     |     |     |         |     |     |     |         |     |     |     |         |     |     |     |                    |     |     |     |           |     |     |     |
| Hispanic or Latino                  | <b>91/163 (56)</b>                                                                       |     |     |     | 20      |     |     |     | 47      |     |     |     | 24      |     |     |     | <b>16/108 (15)</b> |     |     |     | 16        |     |     |     |
|                                     | 40                                                                                       | 43  | 40  | 40  | 0       | 8   | 10  | 2   | 0       | 14  | 12  | 21  | 0       | 12  | 8   | 4   | 27                 | 25  | 27  | 29  | 0         | 6   | 6   | 4   |
| Not reported                        | <b>0/2 (0)</b>                                                                           |     |     |     | 0       |     |     |     | 0       |     |     |     | 0       |     |     |     | <b>0</b>           |     |     |     | 0         |     |     |     |
|                                     | 0                                                                                        | 0   | 0   | 2   | 0       | 0   | 0   | 0   | 0       | 0   | 0   | 0   | 0       | 0   | 0   | 0   | 0                  | 0   | 0   | 0   | 0         | 0   | 0   | 0   |
| <b>Country, n/N (%)</b>             |                                                                                          |     |     |     |         |     |     |     |         |     |     |     |         |     |     |     |                    |     |     |     |           |     |     |     |
| Finland                             | <b>0/62 (0)</b>                                                                          |     |     |     | 0       |     |     |     | 0       |     |     |     | 0       |     |     |     | <b>0</b>           |     |     |     | 0         |     |     |     |
|                                     | 16                                                                                       | 15  | 15  | 16  | 0       | 0   | 0   | 0   | 0       | 0   | 0   | 0   | 0       | 0   | 0   | 0   | 0                  | 0   | 0   | 0   | 0         | 0   | 0   | 0   |
| Colombia                            | <b>63/129 (49)</b>                                                                       |     |     |     | 12      |     |     |     | 32      |     |     |     | 19      |     |     |     | <b>7/48 (15)</b>   |     |     |     | 7         |     |     |     |
|                                     | 33                                                                                       | 32  | 31  | 33  | 0       | 5   | 5   | 2   | 0       | 8   | 9   | 15  | 0       | 10  | 7   | 2   | 12                 | 12  | 12  | 12  | 0         | 3   | 3   | 3   |
| Panama                              | <b>28/49 (57)</b>                                                                        |     |     |     | 8       |     |     |     | 15      |     |     |     | 5       |     |     |     | <b>9/72 (13)</b>   |     |     |     | 9         |     |     |     |
|                                     | 12                                                                                       | 13  | 13  | 11  | 0       | 3   | 5   | 0   | 0       | 6   | 3   | 6   | 0       | 2   | 1   | 2   | 18                 | 18  | 18  | 18  | 0         | 3   | 3   | 1   |

259  
260  
261  
262  
263  
264

- a. Subjects recruited in Finland were allocated only to Group 1 (4-<9 y) and Group 2 (1-<4 y). Subjects recruited in Colombia and Panama were allocated to Group 2a (1-<4 y), Group 3 (6-<12 mos) and Group 4 (6 wk-<6 mos), in addition to Group 1 and Group 2. Sources: 1 - <9 yrs<sup>2</sup>, 6 mos - <4 yrs<sup>3</sup>, 6 wks - <6 mos<sup>4</sup>
- b. Young infants (Group 4, 6 wks-<6 mos) and recipients of the 15/15 µg antigen composition were excluded from GII.4 sNAbT breadth analyses; within each age group, the remaining antigen compositions (15/50, 50/50, and 50/150 µg) were combined. See Methods for details.

265 **NOR-215: Patient disposition and demographics among HIL-214 vaccinated adults tested for GII.4**  
 266 **sNAbT breadth**

267 **Table S16. Summary of demographic characteristics of adults evaluated for GII.4 sNAb breadth among**  
 268 **recipients of a single dose of a HIL-214 (50/150 µg) in the NOR-215 study<sup>5</sup>.**

269

| Age Group                           | Number of participants, n/N (%)     |
|-------------------------------------|-------------------------------------|
|                                     | Composition (50/150 µg)/Single-Dose |
|                                     | <b>18-&lt;50 yrs</b>                |
| <b>Total n/N, (%)</b>               | <b>77/80 (96%)</b>                  |
| <b>Age, mean, (yr)</b>              | 35.2                                |
| <b>Gender, male, n/n (%)</b>        | 31/32 (97)                          |
| <b>Race, n/N (%)</b>                |                                     |
| White                               | 28/31 (90)                          |
| American Indian or Alaska Native    | 1/1 (100)                           |
| Asian                               | 5/5 (100)                           |
| Black or African American           | 40/40 (100)                         |
| Native Hawaiian or Pacific Islander | 0                                   |
| Multiracial                         | 2/2 (100)                           |
| Other                               | 1/1 (100)                           |
| <b>Ethnicity, n/N (%)</b>           |                                     |
| Hispanic or Latino                  | 16/17 (94)                          |
| Not Hispanic or Latino              | 61/63 (97)                          |
| <b>Country, n/N (%)</b>             |                                     |
| United States                       | 77/80 (96)                          |

270

271

## NOR-202/NOR-215: HIL-214 boosts GII.4 sNAbT breadth in older children and adults exposed to contemporary GII.4\_SY variants

272

**Table S17. GII.4 sNAb GMT (95% CI) in infants, toddlers, and children aged 0.5-<9 years in the NOR-202 study and adults aged 18-<50 years in**

273

**the NOR-215 study.** Sera were collected pre-vaccination (Pre-Vx) and 28 days post-dose 1 vaccination (Post-Vx) with HIL-214 (for NOR-202 combined

274

formulations/compositions groups, see **Table S15**). Bolded values represent significant difference of sNAbT from pre-vaccination values for the same

275

GII.4 variant (Mann-Whitney test).

| Age Group                       | NOR-202                                                  |                                                         |                                                            |                                                          |                                                              |                       |                                                          |                                         |                  |                                                            | NOR-215                                                   |                                                            |
|---------------------------------|----------------------------------------------------------|---------------------------------------------------------|------------------------------------------------------------|----------------------------------------------------------|--------------------------------------------------------------|-----------------------|----------------------------------------------------------|-----------------------------------------|------------------|------------------------------------------------------------|-----------------------------------------------------------|------------------------------------------------------------|
|                                 | HIL-214 (1 dose of 15/50, 50/50, or 50/150 µg; combined) |                                                         |                                                            |                                                          |                                                              |                       |                                                          |                                         |                  |                                                            |                                                           | 1x 50/150 µg                                               |
|                                 | 0.5-<1 yr<br>(N=16)                                      | 1-<2 yr<br>(N=20)                                       | 2-<3 yr<br>(N=47)                                          | 3-<4 yr<br>(N=24)                                        | 4-<5 yr<br>(N=11)                                            | 5-<6 yr<br>(N=3)      | 6-<7 yr<br>(N=6)                                         | 7-<8 yr<br>(N=4)                        | 8-<9 yr<br>(N=0) | 1-<4 yr<br>(N=91)                                          | 4-<9yr<br>(N=24)                                          | 18-<50 yr<br>(N=77)                                        |
| <b>GII.4 sNAb, GMT (95% CI)</b> |                                                          |                                                         |                                                            |                                                          |                                                              |                       |                                                          |                                         |                  |                                                            |                                                           |                                                            |
| <b>GII.4c</b>                   |                                                          |                                                         |                                                            |                                                          |                                                              |                       |                                                          |                                         |                  |                                                            |                                                           |                                                            |
| Pre-Vx                          | 33.7<br>(26.3-43.28)                                     | 125.9<br>(66.8-237.5)                                   | 135.7<br>(91.4-201.5)                                      | 158.6<br>(78.7-319.7)                                    | 480.5<br>(259.5-889.5)                                       | 116.8<br>(26.1-523.6) | 169.7<br>(62.8-458.4)                                    | 81.0<br>(12.3-533.0)                    | —                | 139.1<br>(103.4-187.1)                                     | 230.7<br>(142.3-373.9)                                    | 171.8<br>(125.8-234.5)                                     |
| Post-Vx                         | <b>94.0</b><br><b>(54.0-163.6)</b><br><i>P=0.0004</i>    | <b>443.2</b><br><b>(201.1-976.4)</b><br><i>P=0.0134</i> | <b>1931</b><br><b>(1137-3278)</b><br><i>P&lt;0.0001</i>    | <b>1856</b><br><b>(901.4-3821)</b><br><i>P&lt;0.0001</i> | <b>9107</b><br><b>(5260-15767)</b><br><i>P&lt;0.0001</i>     | 3451<br>(875.8-13598) | <b>2642</b><br><b>(696.6-10024)</b><br><i>P=0.0152</i>   | 1023<br>(55.1-18978)                    | —                | <b>1383</b><br><b>(942.8-2028)</b><br><i>P&lt;0.0001</i>   | <b>4112</b><br><b>(2333-7248)</b><br><i>P&lt;0.0001</i>   | <b>2831</b><br><b>(1922-4169)</b><br><i>P&lt;0.0001</i>    |
| <b>GII.4_SF</b>                 |                                                          |                                                         |                                                            |                                                          |                                                              |                       |                                                          |                                         |                  |                                                            |                                                           |                                                            |
| Pre-Vx                          | 32.3<br>(27.6-37.9)                                      | 96.7<br>(51.9-180.2)                                    | 107.8<br>(75.2-154.4)                                      | 153.0<br>(74.9-312.7)                                    | 208.8<br>(127.0-343.3)                                       | 139.4<br>(16.7-1167)  | 120.9<br>(30.2-483.5)                                    | 30.0<br>(30.0-30.0)                     | —                | 115.4<br>(86.62-153.8)                                     | 125.3<br>(79.48-197.6)                                    | 39.8<br>(34.3-46.3)                                        |
| Post-Vx                         | 32.8<br>(27.1-39.8)<br><i>P&gt;0.9999</i>                | 124.2<br>(63.6-242.3)<br><i>P=0.5864</i>                | <b>382.3</b><br><b>(231.0-632.7)</b><br><i>P&lt;0.0001</i> | 396.1<br>(191.9-817.4)<br><i>P=0.0803</i>                | <b>1190.0</b><br><b>(741.2-1910)</b><br><i>P=0.0001</i>      | 1204<br>(115.0-12597) | 397.1<br>(98.1-1607)<br><i>P=0.1277</i>                  | 121.3<br>(8.9-1644)<br><i>P=0.4286</i>  | —                | <b>301.4</b><br><b>(211.3-430.0)</b><br><i>P&lt;0.0001</i> | <b>618.9</b><br><b>(351.0-1091)</b><br><i>P&lt;0.0001</i> | <b>129.2</b><br><b>(100.0-166.9)</b><br><i>P&lt;0.0001</i> |
| <b>GII.4_SY</b>                 |                                                          |                                                         |                                                            |                                                          |                                                              |                       |                                                          |                                         |                  |                                                            |                                                           |                                                            |
| Pre-Vx                          | 41.9<br>(20.6-85.4)                                      | 637.2<br>(199.5-2035)                                   | 644.9<br>(349.9-1188)                                      | 792.1<br>(341.0-1840)                                    | 1668<br>(1040-2676)                                          | 1118<br>(934.9-1336)  | 618.1<br>(117.3-3256)                                    | 173.1<br>(6.8-4382)                     | —                | 679.0<br>(435.6-1058)                                      | 848.7<br>(467.6-1540)                                     | 87.3<br>(65.5-111.1)                                       |
| Post-Vx                         | 44.1<br>(21.8-89.4)<br><i>P&gt;0.9999</i>                | 795.3<br>(211.4-2993)<br><i>P=0.3553</i>                | <b>2763</b><br><b>(1204-6343)</b><br><i>P=0.0001</i>       | <b>2802</b><br><b>(970.3-8092)</b><br><i>P=0.0076</i>    | <b>16079.0</b><br><b>(10855-23818)</b><br><i>P&lt;0.0001</i> | 7391<br>(2206-24771)  | <b>3527.0</b><br><b>(421.5-29509)</b><br><i>P=0.0411</i> | 442.7<br>(3.1-64142)<br><i>P=0.6571</i> | —                | <b>2109</b><br><b>(1185-3755)</b><br><i>P&lt;0.0001</i>    | <b>5487</b><br><b>(2345-12839)</b><br><i>P&lt;0.0001</i>  | <b>491.7</b><br><b>(344.5-701.8)</b><br><i>P&lt;0.0001</i> |
| <b>GII.4_WI</b>                 |                                                          |                                                         |                                                            |                                                          |                                                              |                       |                                                          |                                         |                  |                                                            |                                                           |                                                            |
| Pre-Vx                          | 40.8<br>(24.9-66.7)                                      | 234.7<br>(101.6-542.3)                                  | 207.2<br>(132.7-323.7)                                     | 289.3<br>(137.3-609.8)                                   | 529.8<br>(341.8-808.8)                                       | 548.6<br>(252.5-1192) | 383.3<br>(86.8-1692)                                     | 141.3<br>(7.5-2661)                     | —                | 232.6<br>(165.5-326.9)                                     | 392.4<br>(242.3-635.4)                                    | 54.2<br>(44.4-66.2)                                        |
| Post-Vx                         | 40.4<br>(25.5-64.1)<br><i>P&gt;0.9999</i>                | 267.6<br>(114.7-624.2)<br><i>P=0.9452</i>               | <b>625.8</b><br><b>(351.6-1114)</b><br><i>P=0.0013</i>     | 630.3<br>(294.8-1348)<br><i>P=0.1397</i>                 | <b>3448</b><br><b>(2298-5173)</b><br><i>P&lt;0.0001</i>      | 3253<br>(523.4-20212) | <b>1287</b><br><b>(180.5-9172)</b><br><i>P=0.0433</i>    | 307.4<br>(4.0-23420)<br><i>P=0.6571</i> | —                | <b>520.2</b><br><b>(350.1-773.0)</b><br><i>P=0.0007</i>    | <b>1788</b><br><b>(887.2-3604)</b><br><i>P&lt;0.0001</i>  | <b>259.5</b><br><b>(191.2-352.2)</b><br><i>P&lt;0.0001</i> |
| <b>GII.4_AL</b>                 |                                                          |                                                         |                                                            |                                                          |                                                              |                       |                                                          |                                         |                  |                                                            |                                                           |                                                            |
| Pre-Vx                          | 34.3<br>(25.8-45.7)                                      | 169.7<br>(83.6-344.3)                                   | 136.9<br>(92.4-202.7)                                      | 165.4<br>(86.7-315.3)                                    | 344.8<br>(212.3-559.8)                                       | 248.7<br>(16.3-3803)  | 174.1<br>(63.1-480.7)                                    | 72.5<br>(9.7-541.6)                     | —                | 150.8<br>(112.3-202.5)                                     | 215.2<br>(139.0-333.0)                                    | 56.0<br>(45.4-69.1)                                        |
| Post-Vx                         | 34.6<br>(25.5-47.0)<br><i>P&gt;0.9999</i>                | 239.3<br>(100.3-570.9)<br><i>P=0.4248</i>               | <b>938.3</b><br><b>(491.9-1790)</b><br><i>P&lt;0.0001</i>  | <b>844.5</b><br><b>(352.1-2025)</b><br><i>P=0.0029</i>   | <b>4673</b><br><b>(2870-7608)</b><br><i>P&lt;0.0001</i>      | 2084<br>(485.4-8946)  | <b>1124</b><br><b>(164.1-7700)</b><br><i>P=0.0433</i>    | 259.1<br>(4.1-16374)<br><i>P=0.6571</i> | —                | <b>675.9</b><br><b>(432.2-1057)</b><br><i>P&lt;0.0001</i>  | <b>1827</b><br><b>(876.6-3807)</b><br><i>P&lt;0.0001</i>  | <b>367.9</b><br><b>(271.3-498.9)</b><br><i>P&lt;0.0001</i> |
| <b>GII.4_US95/96</b>            |                                                          |                                                         |                                                            |                                                          |                                                              |                       |                                                          |                                         |                  |                                                            |                                                           |                                                            |
| Pre-Vx                          | 33.3<br>(26.7-41.5)                                      | 81.2<br>(44.6-148.0)                                    | 81.9<br>(57.1-117.7)                                       | 111.4<br>(57.9-214.4)                                    | 131.6<br>(63.6-272.7)                                        | 41.8<br>(10.1-173.5)  | 70.8<br>(30.8-162.8)                                     | 60.8<br>(16.4-225.4)                    | —                | 88.69<br>(67.30-116.9)                                     | 85.88<br>(56.90-129.6)                                    | 283.0<br>(192.2-416.8)                                     |
| Post-Vx                         | 34.0<br>(26.1-44.3)<br><i>P&gt;0.9999</i>                | 113.9<br>(62.4-207.7)<br><i>P=0.3342</i>                | <b>278.2</b><br><b>(176.8-437.7)</b><br><i>P=0.0001</i>    | 304.4<br>(147.8-626.8)<br><i>P=0.0527</i>                | <b>1758</b><br><b>(1121-2759)</b><br><i>P&lt;0.0001</i>      | 891.2<br>(29.1-27327) | <b>604.9</b><br><b>(215.1-1702)</b><br><i>P=0.0043</i>   | 222.2<br>(5.2-9456)<br><i>P=0.6571</i>  | —                | <b>234.1</b><br><b>(168.8-324.6)</b><br><i>P&lt;0.0001</i> | <b>876.3</b><br><b>(490.3-1566)</b><br><i>P&lt;0.0001</i> | <b>1942</b><br><b>(1171-3220)</b><br><i>P&lt;0.0001</i>    |

276  
277  
278

**Table S18. GII.4 sNAb GMFR (95% CI) in infants, toddlers, and children aged 0.5-<9 years in the NOR-202 study and adults aged 18-<50 years in the NOR-215 study.** Sera were collected pre-vaccination (Pre-Vx) and 28 days post-dose 1 vaccination (Post-Vx) with HIL-214 (for NOR-202 combined formulations/compositions groups, see **Table S15**). GMFR ≥4.0 are bolded.

| Age Group                        | Number of participants, N                                |                   |                                  |                                  |                                  |                                   |                                  |                                  |                  |                                 |                                   |                                   |
|----------------------------------|----------------------------------------------------------|-------------------|----------------------------------|----------------------------------|----------------------------------|-----------------------------------|----------------------------------|----------------------------------|------------------|---------------------------------|-----------------------------------|-----------------------------------|
|                                  | NOR-202                                                  |                   |                                  |                                  |                                  |                                   |                                  |                                  |                  |                                 | NOR-215                           |                                   |
|                                  | HIL-214 (1 dose of 15/50, 50/50, or 50/150 µg; combined) |                   |                                  |                                  |                                  |                                   |                                  |                                  |                  |                                 | 1x 50/150 µg                      |                                   |
|                                  | 0.5-<1 yr<br>(N=16)                                      | 1-<2 yr<br>(N=20) | 2-<3 yr<br>(N=47)                | 3-<4 yr<br>(N=24)                | 4-<5 yr<br>(N=11)                | 5-<6 yr<br>(N=3)                  | 6-<7 yr<br>(N=6)                 | 7-<8 yr<br>(N=4)                 | 8-<9 yr<br>(N=0) | 1-<4 yr<br>(N=91)               | 4-<9yr<br>(N=24)                  | 18-<50 yr<br>(N=77)               |
| <b>GII.4 sNAb, GMFR (95% CI)</b> |                                                          |                   |                                  |                                  |                                  |                                   |                                  |                                  |                  |                                 |                                   |                                   |
| GII.4c                           | 2.8<br>(1.7-4.6)                                         | 3.5<br>(1.9-6.4)  | <b>14.2</b><br><b>(9.5-21.3)</b> | <b>11.7</b><br><b>(5.3-25.5)</b> | <b>19.0</b><br><b>(9.7-37.2)</b> | <b>29.5</b><br><b>(2.6-338.6)</b> | <b>15.6</b><br><b>(7.5-32.3)</b> | <b>12.6</b><br><b>(2.5-64.1)</b> | —                | <b>9.9</b><br><b>(7.2-13.8)</b> | <b>17.8</b><br><b>(12.2-26.1)</b> | <b>16.5</b><br><b>(12.4-21.9)</b> |
| GII.4_SF                         | 1.0<br>(1.0-1.1)                                         | 1.3<br>(0.8-2.1)  | 3.5<br>(2.4-5.2)                 | 2.6<br>(1.3-5.1)                 | <b>5.7</b><br><b>(2.8-11.6)</b>  | <b>8.6</b><br><b>(6.6-11.4)</b>   | 3.3<br>(1.2-9.2)                 | <b>4.0</b><br><b>(0.3-54.8)</b>  | —                | 2.6<br>(2.0-3.5)                | <b>4.9</b><br><b>(3.1-7.8)</b>    | 3.2<br>(2.6-4.1)                  |
| GII.4_SY                         | 1.1<br>(0.9-1.2)                                         | 1.2<br>(0.7-2.1)  | <b>4.3</b><br><b>(2.9-6.3)</b>   | 3.5<br>(2.1-6.0)                 | <b>9.6</b><br><b>(5.9-15.8)</b>  | <b>6.6</b><br><b>(2.6-18.6)</b>   | <b>5.7</b><br><b>(2.5-12.9)</b>  | 2.6<br>(0.4-14.7)                | —                | 3.1<br>(2.3-4.1)                | <b>6.5</b><br><b>(4.5-9.4)</b>    | <b>5.6</b><br><b>(4.3-7.4)</b>    |
| GII.4_WI                         | 1.0<br>(0.9-1.1)                                         | 1.1<br>(0.8-1.7)  | 3.0<br>(2.1-4.3)                 | 2.2<br>(1.3-3.6)                 | <b>6.6</b><br><b>(3.6-11.8)</b>  | <b>5.9</b><br><b>(1.1-33.1)</b>   | 3.4<br>(1.5-7.7)                 | 2.2<br>(0.5-9.1)                 | —                | 2.2<br>(1.7-2.9)                | <b>4.6</b><br><b>(3.1-6.7)</b>    | <b>4.8</b><br><b>(3.7-6.2)</b>    |
| GII.4_AL                         | 1.0<br>(1.0-1.0)                                         | 1.4<br>(0.8-2.6)  | <b>6.9</b><br><b>(4.3-11.0)</b>  | <b>5.1</b><br><b>(2.4-10.9)</b>  | <b>13.6</b><br><b>(7.1-25.6)</b> | <b>8.4</b><br><b>(1.7-41.7)</b>   | <b>6.5</b><br><b>(1.9-22.0)</b>  | 3.6<br>(0.3-37.2)                | —                | <b>4.5</b><br><b>(3.1-6.4)</b>  | <b>8.5</b><br><b>(5.3-13.6)</b>   | <b>6.6</b><br><b>(5.0-8.7)</b>    |
| GII.4_US95/96                    | 1.0<br>(1.0-1.1)                                         | 1.4<br>(0.8-2.3)  | 3.4<br>(2.3-4.9)                 | 2.7<br>(1.4-5.3)                 | <b>13.4</b><br><b>(5.2-34.2)</b> | <b>21.3</b><br><b>(0.4-1216)</b>  | <b>8.5</b><br><b>(4.4-16.4)</b>  | 3.7<br>(0.3-46.8)                | —                | 2.6<br>(2.0-3.5)                | <b>10.2</b><br><b>(5.8-18.0)</b>  | <b>6.9</b><br><b>(5.3-9.0)</b>    |

279

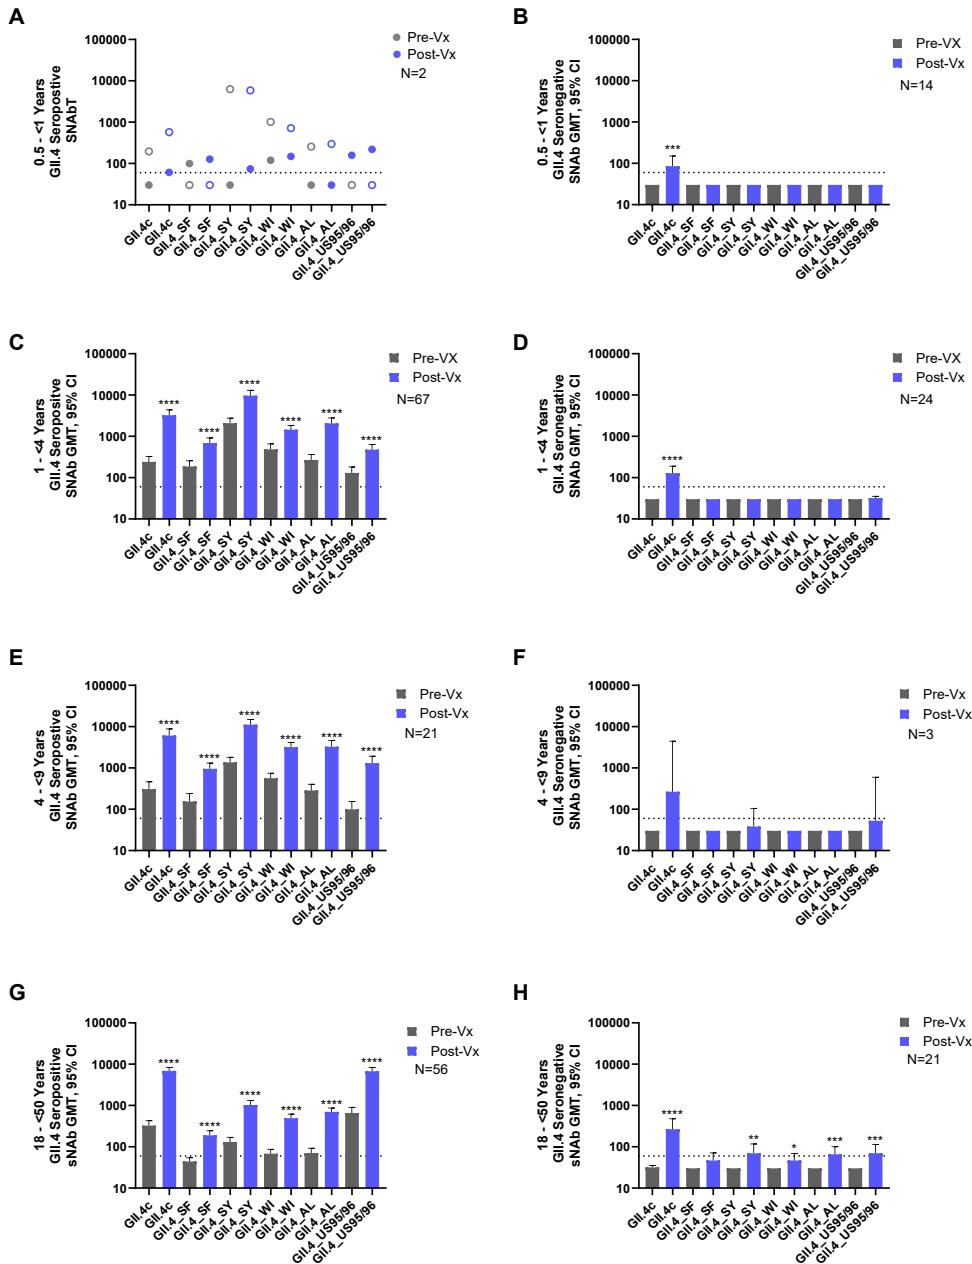

280

281 **Figure S4 GII.4 sNAb responses by pre-vaccination serostatus following HIL-214 vaccination in**  
 282 **participants aged 0.5-50 years in the NOR-202 and NOR-215 studies.** Archived sera collected from infants  
 283 (N=16; aged 0.5-<1 yrs), toddlers (N=91; aged 1-<4 yrs), children (N=22; aged 4-<9 yrs) (NOR-202 study;  
 284 combined compositions (15/50, 50/50, 50/150  $\mu\text{g}$ ); conducted from 2015-2018) and adults (N=77; aged 18-<50  
 285 yrs) (NOR-215 study; 50/150  $\mu\text{g}$  composition; conducted in 2023) at Day 1/pre-vaccination (Pre-Vx) and 28 days  
 286 post-vaccination (Post-Vx) with a single dose of HIL-214, were analyzed for sNAbT breadth against GII.4c,  
 287 contemporary variants (GII.4\_SF, GII.4\_SY, GII.4\_WI, GII.4\_AL) and an ancestral variant (GII.4\_US96/96). **(A)**  
 288 infants, **(B)** toddlers, **(C)** children, and **(D)** adults were grouped by Pre-Vx GII.4 variant seropositivity (ID<sub>50</sub>  $\geq$ 60 to  
 289 to any variant) **(Panels A, C, E)** or GII.4 seronegativity **(Panels B, D, F)** and GII.4 sNAbT measured at 28 days Post-  
 290 Vx. \*,  $P < 0.05$ ; \*\*,  $P < 0.01$ ; \*\*\*,  $P < 0.001$ ; \*\*\*\*,  $P < 0.0001$ , Mann-Whitney test comparing Pre-Vx to Post-Vx. Two  
 291 infants (closed and hollow circles) were GII.4 seropositive Pre-Vx and their GII.4 sNAbTs are shown as  
 292 individual points in panel A at Pre-Vx and Post-Vx.

A

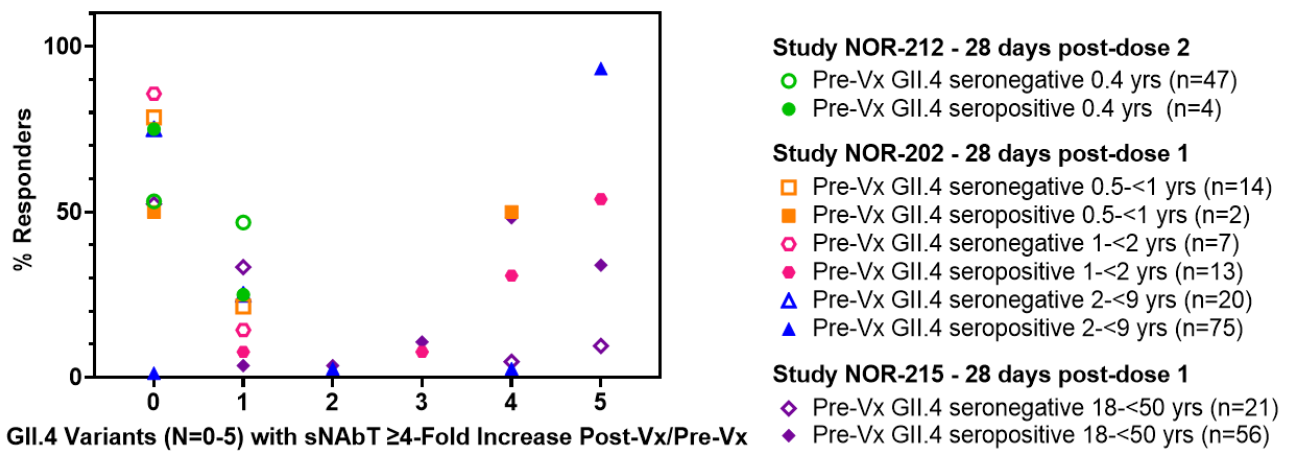

B

| GII.4 Variant Breadth rate Differences by Pre-Vx GII.4 Serostatus |         |                 |         |         |        |         |        |
|-------------------------------------------------------------------|---------|-----------------|---------|---------|--------|---------|--------|
| P Values                                                          |         |                 |         |         |        |         |        |
| Seronegative                                                      | Study   | Age at Vx (yrs) | 0.4     | 0.5-<1  | 1-<2   | 2-<9    | 18-<50 |
|                                                                   | NOR-212 | 0.4             | -       | -       | -      | -       | -      |
|                                                                   | NOR-202 | 0.5-<1          | 0.3006  | -       | -      | -       | -      |
|                                                                   | NOR-202 | 1-<2            | 0.3188  | 0.8480  | -      | -       | -      |
|                                                                   | NOR-202 | 2-<9            | 0.3188  | 0.8987  | 0.7619 | -       | -      |
|                                                                   | NOR-215 | 18-<50          | 0.0118  | 0.0118  | 0.0147 | 0.0029  | -      |
| Seropositive                                                      | Study   | Age at Vx (yrs) | 0.4     | 0.5-<1  | 1-<2   | 2-<9    | 18-<50 |
|                                                                   | NOR-212 | 0.4             | -       | -       | -      | -       | -      |
|                                                                   | NOR-202 | 0.5-<1          | 0.0231  | -       | -      | -       | -      |
|                                                                   | NOR-202 | 1-<2            | <0.0001 | 0.0010  | -      | -       | -      |
|                                                                   | NOR-202 | 2-<9            | <0.0001 | <0.0001 | 0.0257 | -       | -      |
|                                                                   | NOR-215 | 18-<50          | <0.0001 | 0.0013  | 0.5175 | <0.0001 | -      |

293

294 **Figure S5. GII.4 sNAb response breadth and magnitude by ICH E11 age strata and pre-vaccination GII.4**  
 295 **serostatus (NOR-212, NOR-202, NOR-215).** Infants (N=26 HIL-214 (GII.4 AGE+ group) + N=25 HIL-214 (GI/GII  
 296 AGE- group) combined; aged 0.4 yrs) from NOR-212 (2-doses: 50/150  $\mu$ g composition; **Table S11**), infants (N=16  
 297 HIL-214; aged 0.5-1 yr), toddlers (N=91 HIL-214; aged 1-<4 yrs), children (N=22 HIL-214; aged 4-<9 yrs) from  
 298 NOR-202 (1-dose: combined compositions (15/50, 50/50, 50/150  $\mu$ g); **Table S15**), and adults (N=77 HIL-214;  
 299 aged 18<50 yrs; **Table S16**) from NOR-215 (1-dose: 50/150  $\mu$ g composition) were grouped by age according to  
 300 ICH E11 guidelines (0.5-<1 yr, 1-<2 yrs, 2-<9 years, 18-<50 yrs) and GII.4 serostatus Day 1/pre-vaccination (Pre-  
 301 Vx). **(A)** %Responders (GII.4 sNAbT breadth rate) shown as the proportion of participants in each age group with  
 302 a  $\geq$ 4-fold increase in GII.4 sNAbT at 28 days post-vaccination (Post-Vx) compared to pre-vaccination values  
 303 against 0 to 5 GII.4 variants. **(B)** Linear regression models were fitted to estimate the association between age  
 304 and pre-vaccination GII.4 serostatus to post-vaccination GII.4 sNAbT with *P* values (Cochran-Mantel-Haenszel)  
 305 of each comparison reported. **Table S14** shows the number of respondents with a  $\geq$ 4-fold increase in sNAbT to  
 306 GII.4 variants by variant number (N=0-5), study, and age grouping at HIL-214 vaccination.

307

308 Citations:

309 1. Freedman, S.B., Eltorky, M. & Gorelick, M. Evaluation of a gastroenteritis severity score for use  
310 in outpatient settings. *Pediatrics* **125**, e1278-1285 (2010).

311 2. Vesikari, T., et al. Immunogenicity of a bivalent virus-like particle norovirus vaccine in children  
312 from 1 to 8 years of age: A phase 2 randomized, double-blind study. *Vaccine* **40**, 3588-3596  
313 (2022).

314 3. Lopez, P., et al. Immunogenicity and tolerability of a bivalent virus-like particle norovirus  
315 vaccine candidate in children from 6 months up to 4 years of age: A phase 2 randomized,  
316 double-blind trial. *Hum Vaccin Immunother* **19**, 2204787 (2023).

317 4. Sáez-Llorens, X., et al. Safety and immunogenicity of a bivalent norovirus vaccine candidate in  
318 infants from 6 weeks to 5 months of age: A phase 2, randomized, double-blind trial. *Human*  
319 *vaccines & immunotherapeutics* **21**, 2450878 (2025).

320 5. Hillevar, I. NOR-215: Phase 2, Single-arm, Open-label Trial for Serologic Assay Validation,  
321 Proficiency Testing, Safety and Immunogenicity of the Intramuscular HIL-214 Norovirus Vaccine  
322 in Adults Aged 18 to 49 Years. Vol. 2025 NCT05972733 (CT.gov, 2025).

323
